# Supplementary material for: Reseña del libro "España 2010: mercado laboral, proyecciones e implicaciones empresariales" de A. Jiménez, M. Pimentel y M. Mentxu Echevarría. Madrid: Ediciones Díaz de Santos,
Source: Royal Society of Chemistry journal article supplement (doi:10.1039/c7ob02794j), 2003-01-01
Supplement: c7ob02794j1.pdf [file c7ob02794j1.pdf]

## ***Supporting Information***

### **Enantioselective synthesis of novel pyrano[3,2-*c*]chromene derivatives as AChE inhibitors via an organocatalytic domino reaction**

Jie Zheng,<sup>a†</sup> Ming He,<sup>a†</sup> Zhiye Hu,<sup>a</sup> Baohua Xie,<sup>a</sup> Lu Yang,<sup>a</sup> Hai-Bing Zhou,<sup>a\*</sup> Chune Dong<sup>a,b\*</sup>

*<sup>a</sup>State Key Laboratory of Virology, Hubei Province Engineering and Technology Research Center for Fluorinated Pharmaceuticals, Wuhan University School of Pharmaceutical Sciences, Wuhan 430071, China,*

*Fax: (+) 86-27-68759850*

*<sup>b</sup>Key Laboratory of Organofluorine Chemistry, Shanghai Institute of Organic Chemistry, Chinese Academy of Sciences, Shanghai 200032, China*

*<sup>†</sup> The two authors contribute equally.*

*E-mail: [cdong@whu.edu.cn](mailto:cdong@whu.edu.cn); [zhouhb@whu.edu.cn](mailto:zhouhb@whu.edu.cn)*

### **Content**

#### **I Representative NMR spectra of compounds 4 and 1**

#### **II HPLC spectra of 4**

#### **III Computer modeling of the complex structures of AChE protein with (*S*)-4p and (*R*)-4p**

---

\*Corresponding author, *E-mail address:* [zhouhb@whu.edu.cn](mailto:zhouhb@whu.edu.cn), Tel: 027-68759586

\*Corresponding author, *E-mail address:* [cdong@whu.edu.cn](mailto:cdong@whu.edu.cn), Tel: 027-68759586

# I Representative NMR spectra of compounds 4 and 1

## 4a

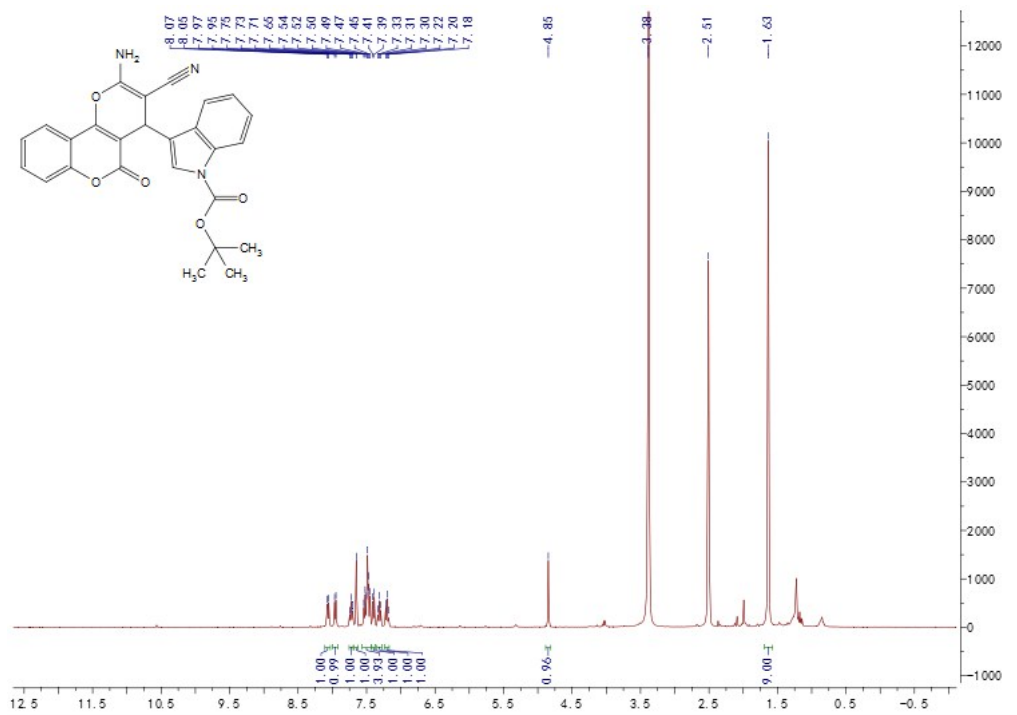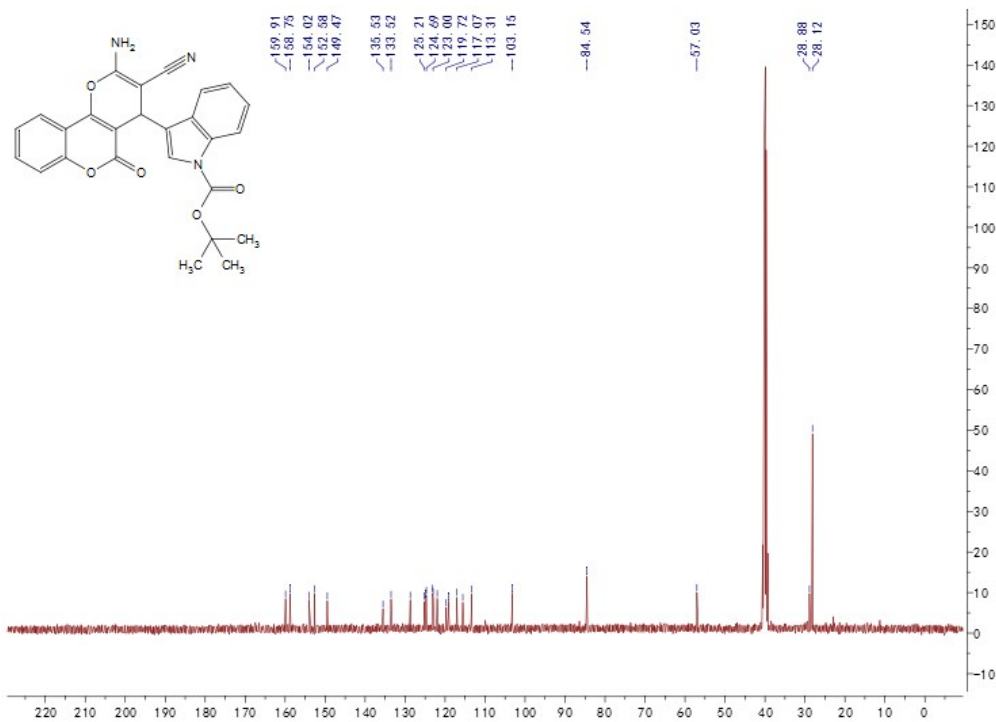

4b

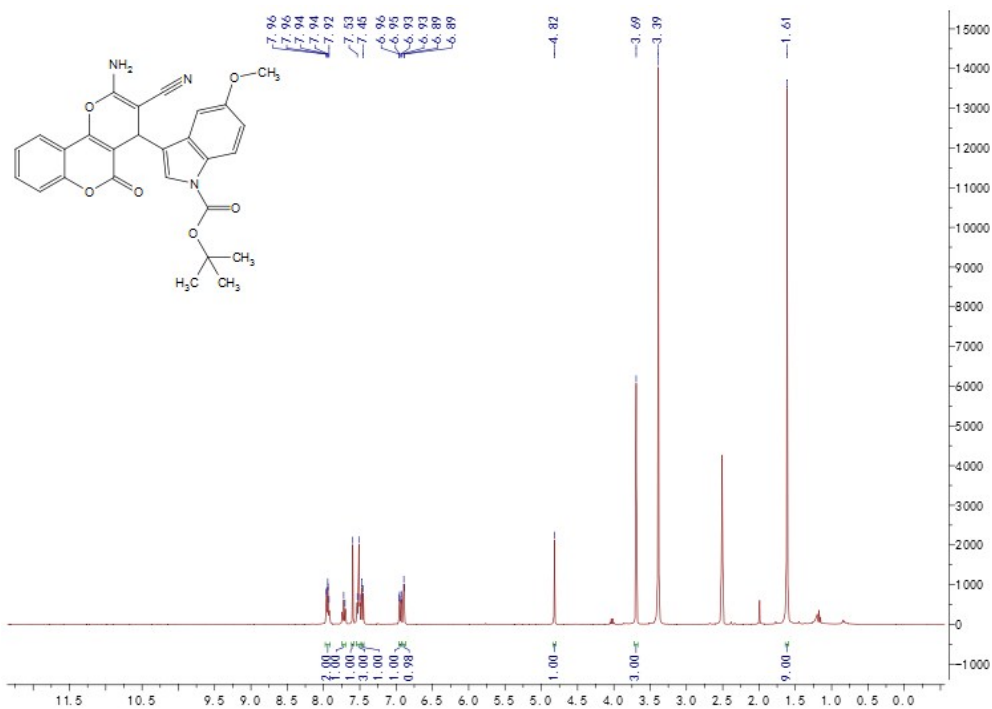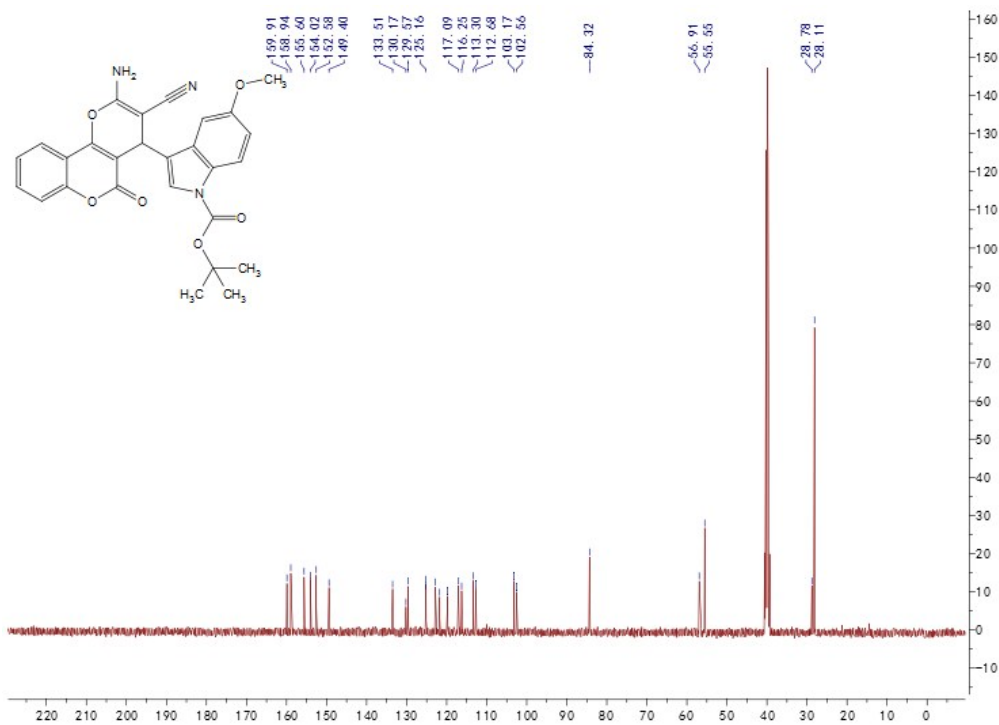

4c

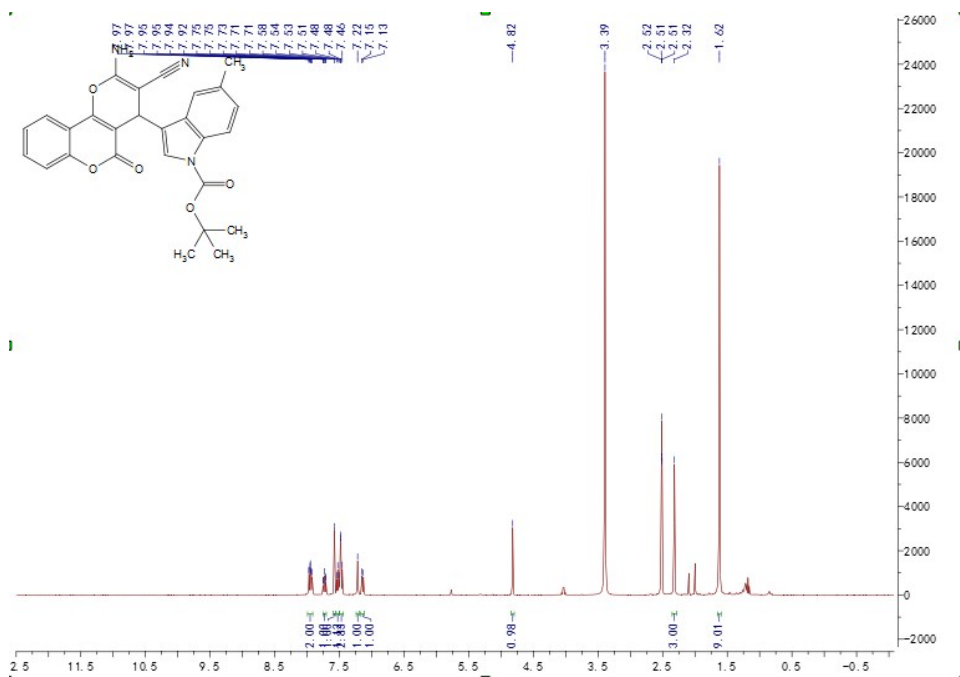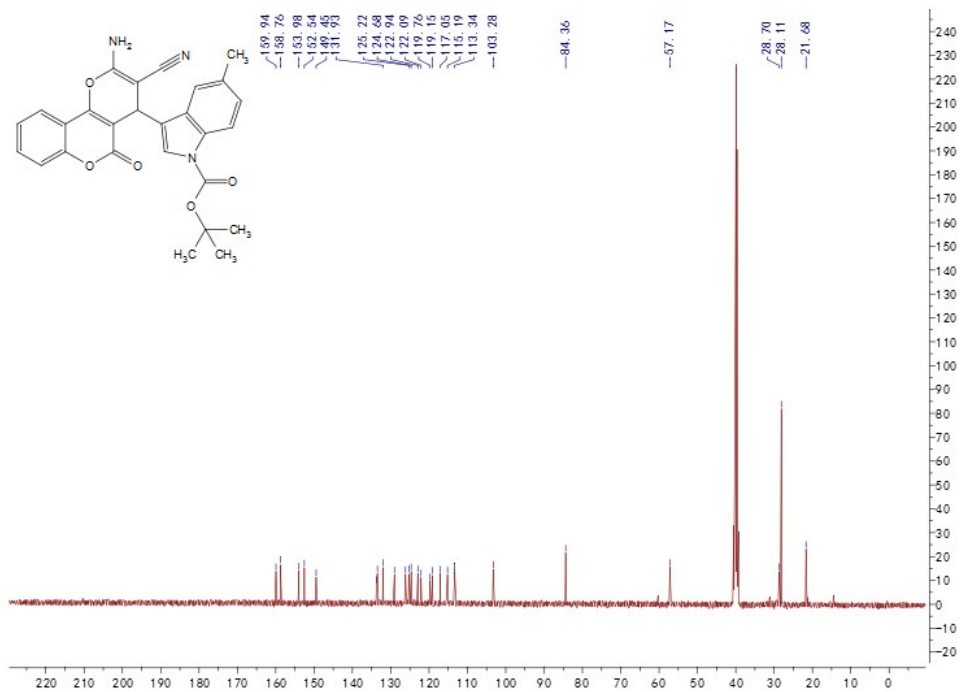

4d

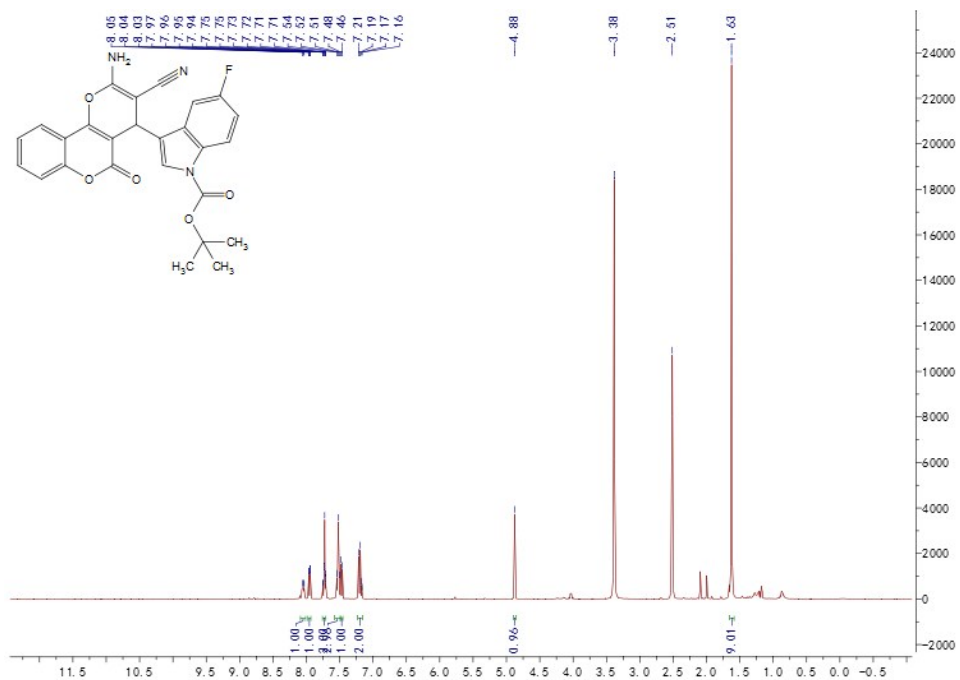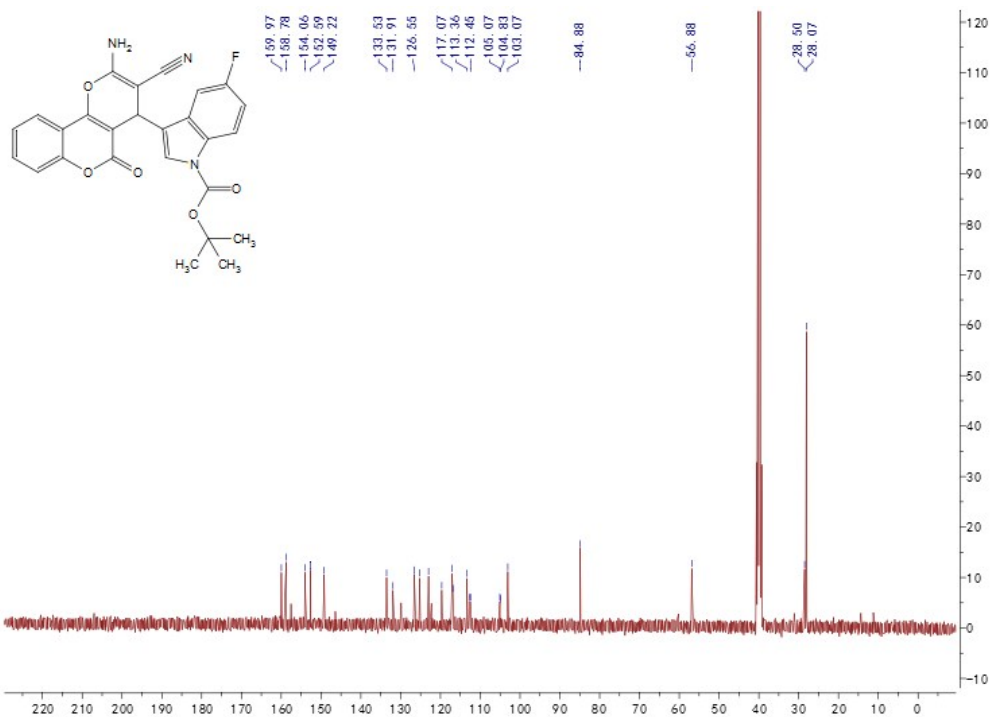

4e

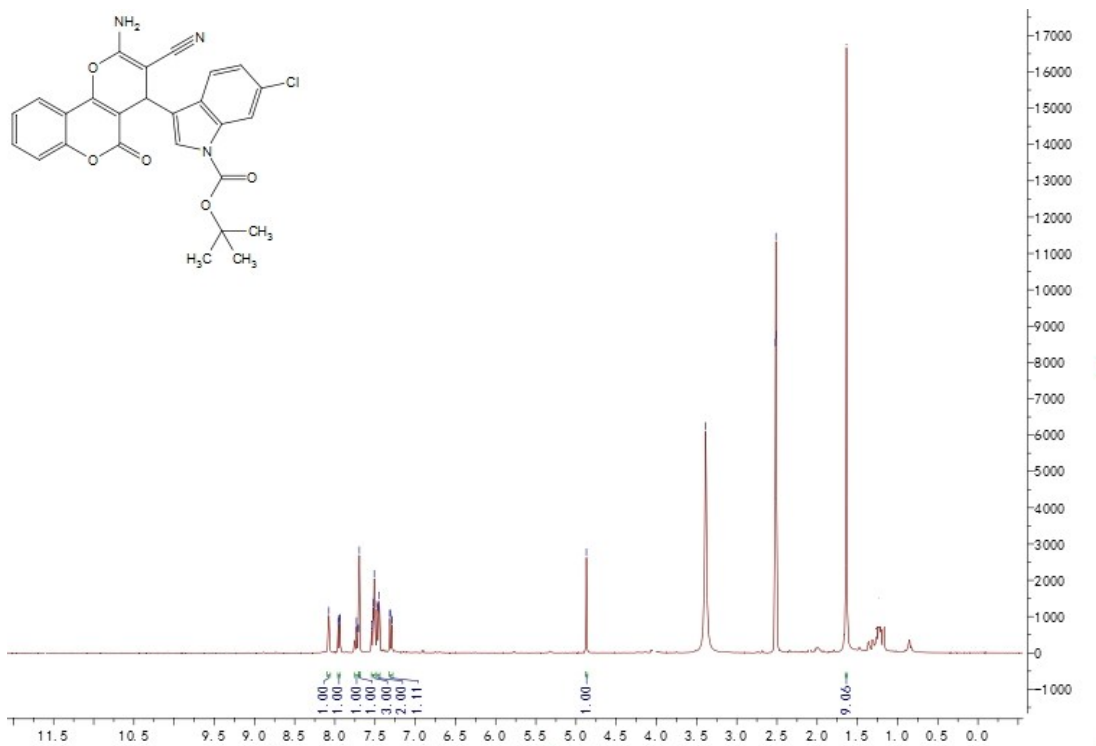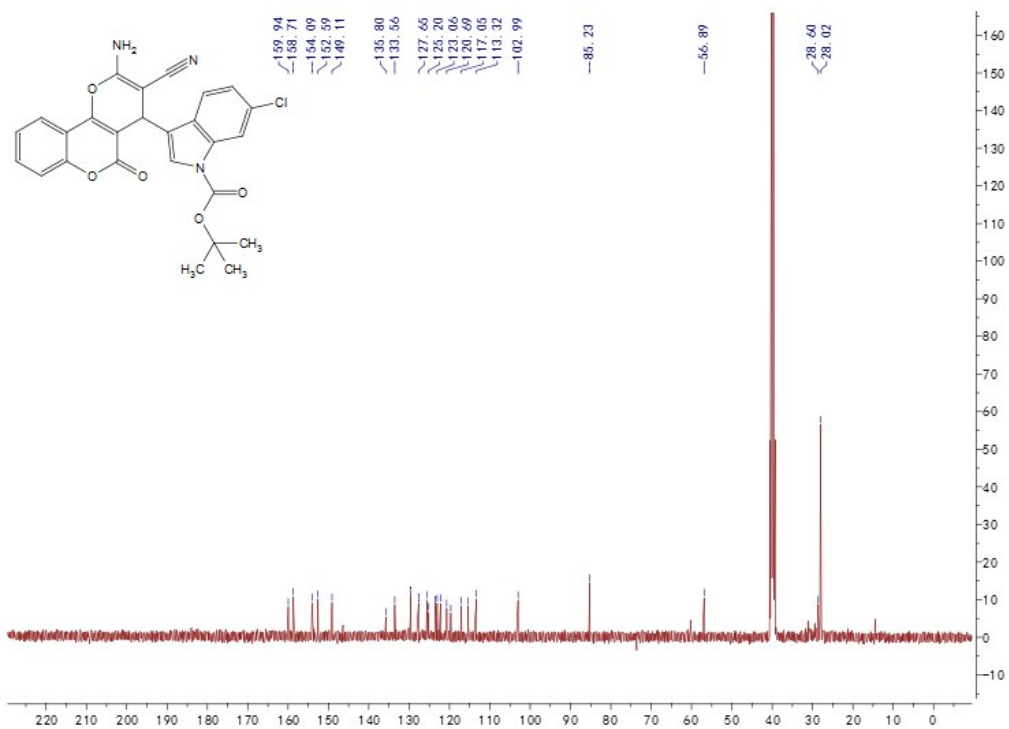

4f

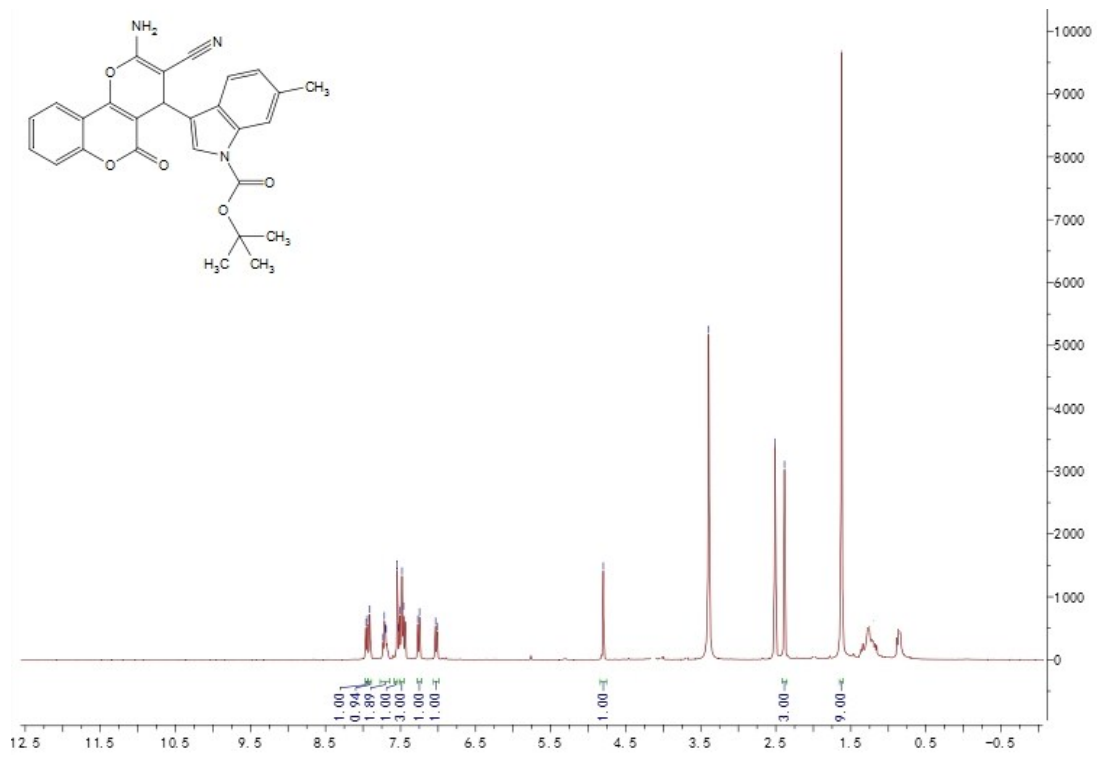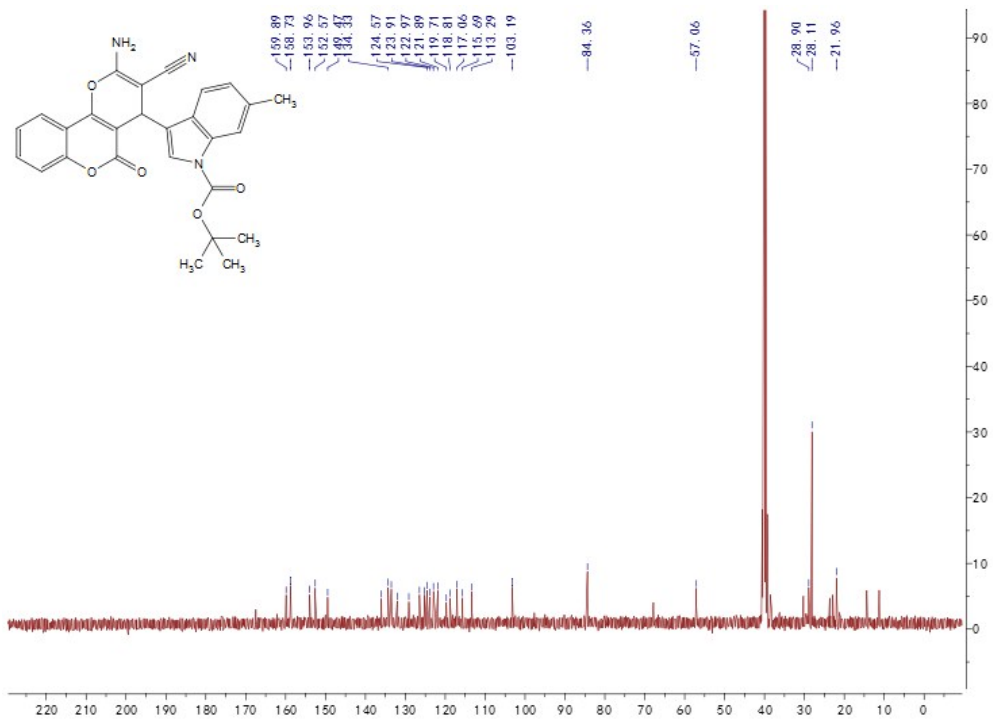

4g

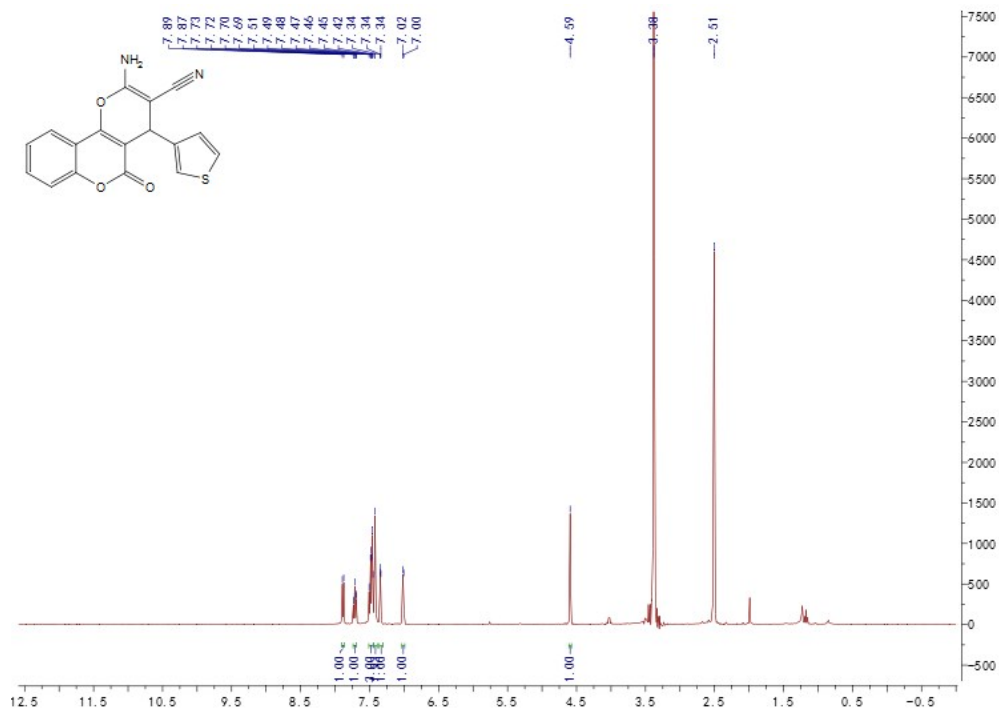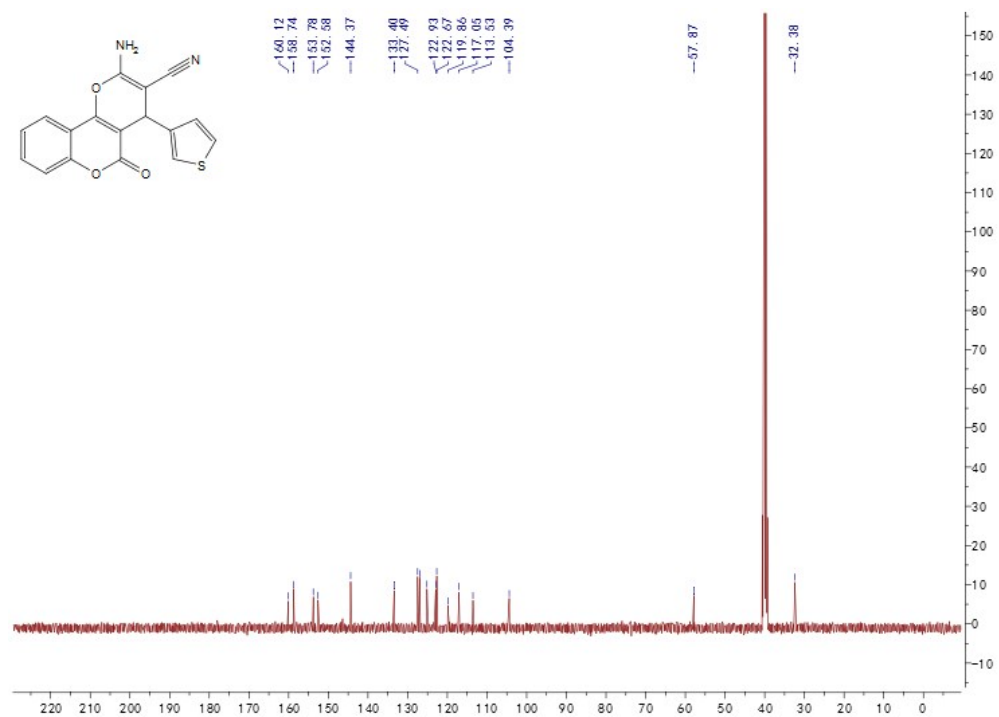



4h

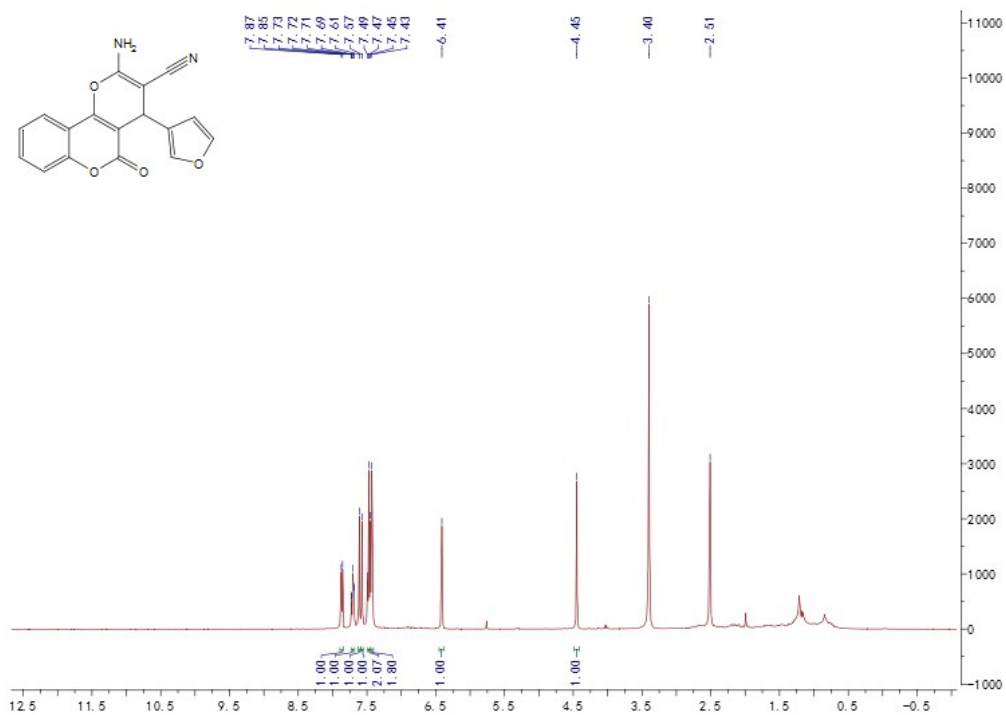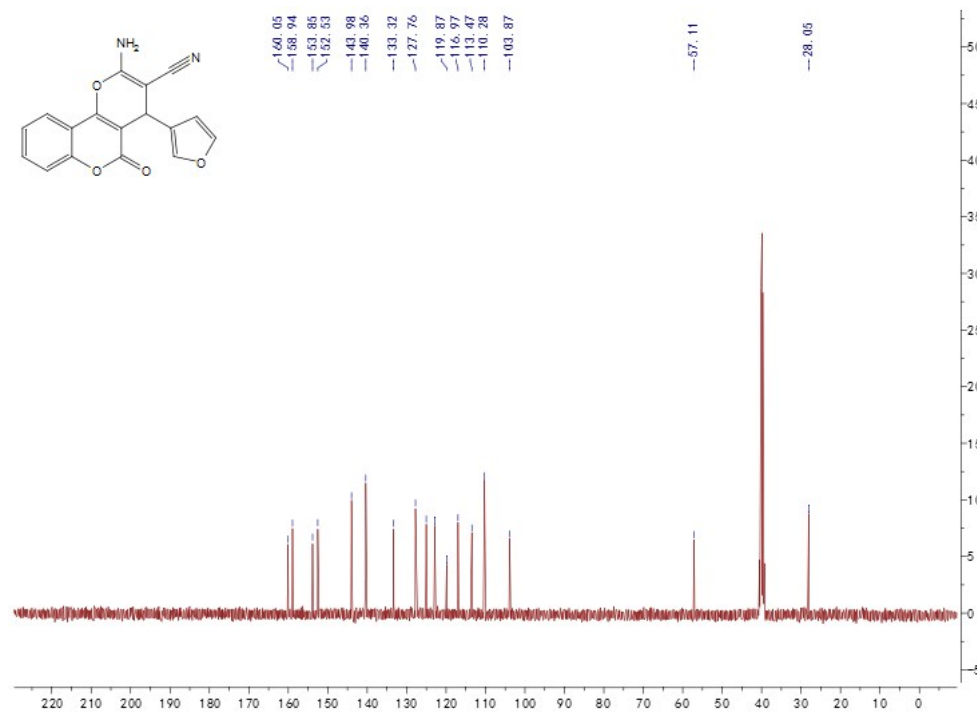

4i

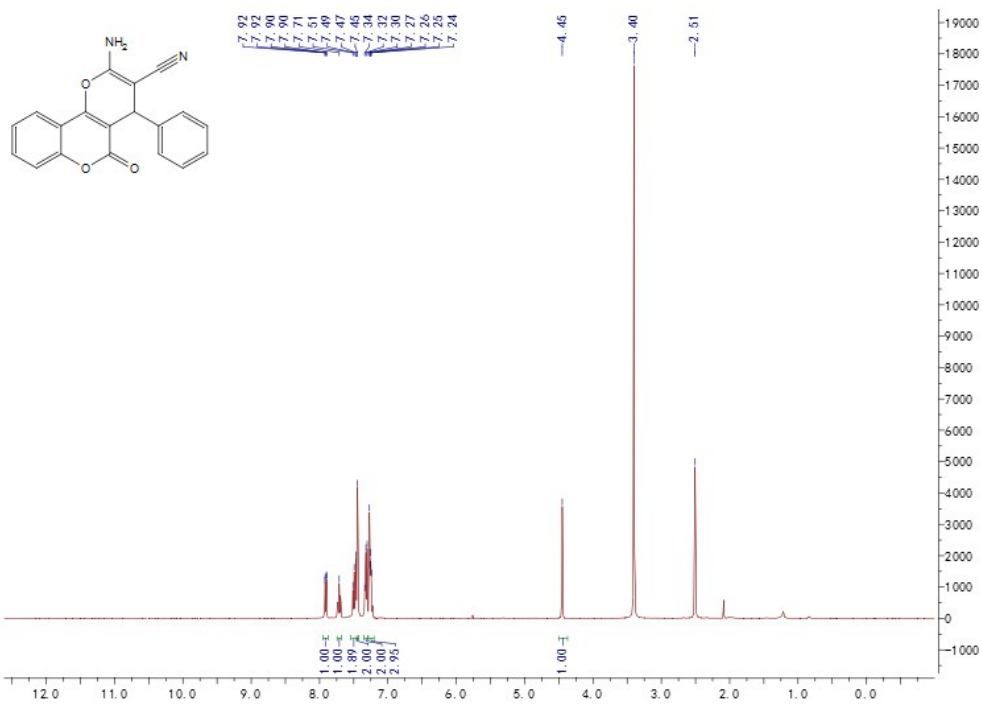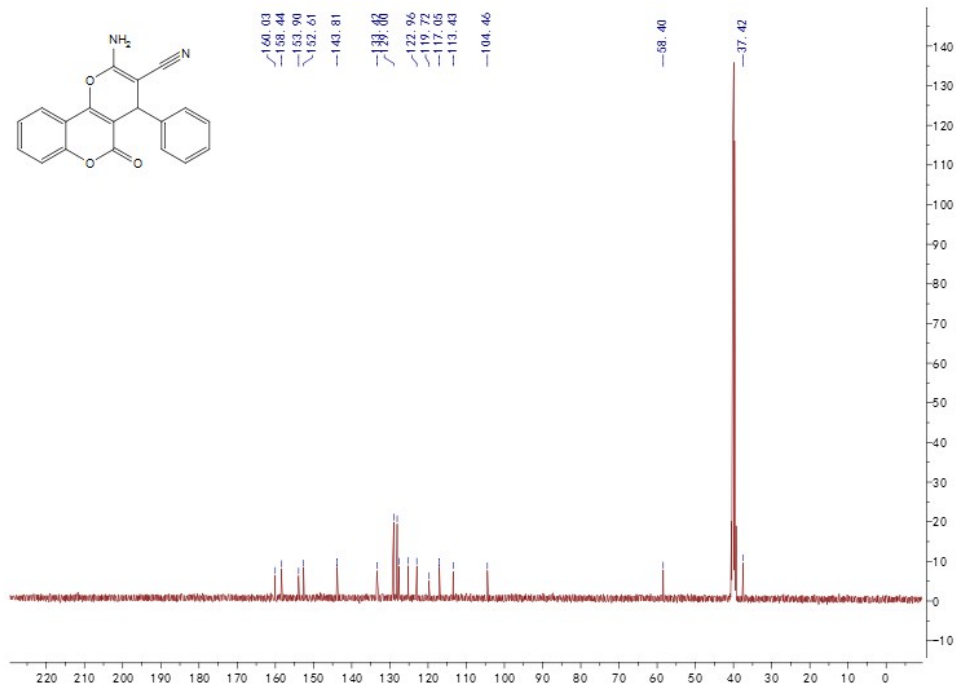

4j

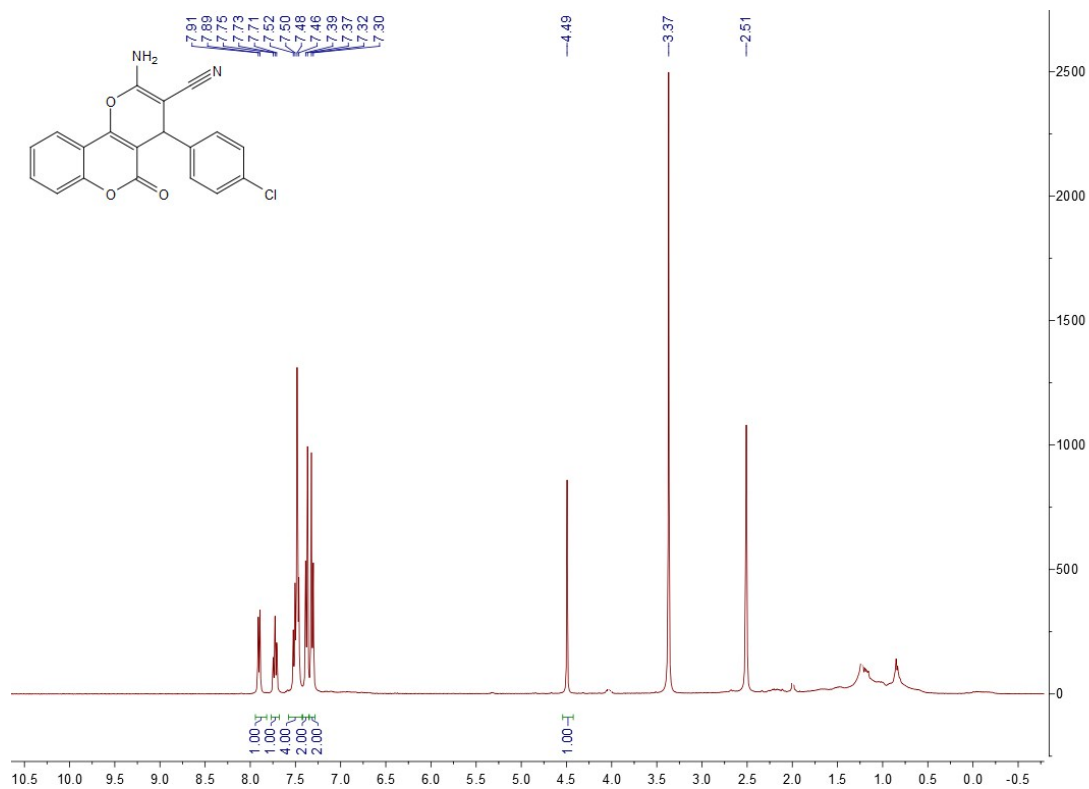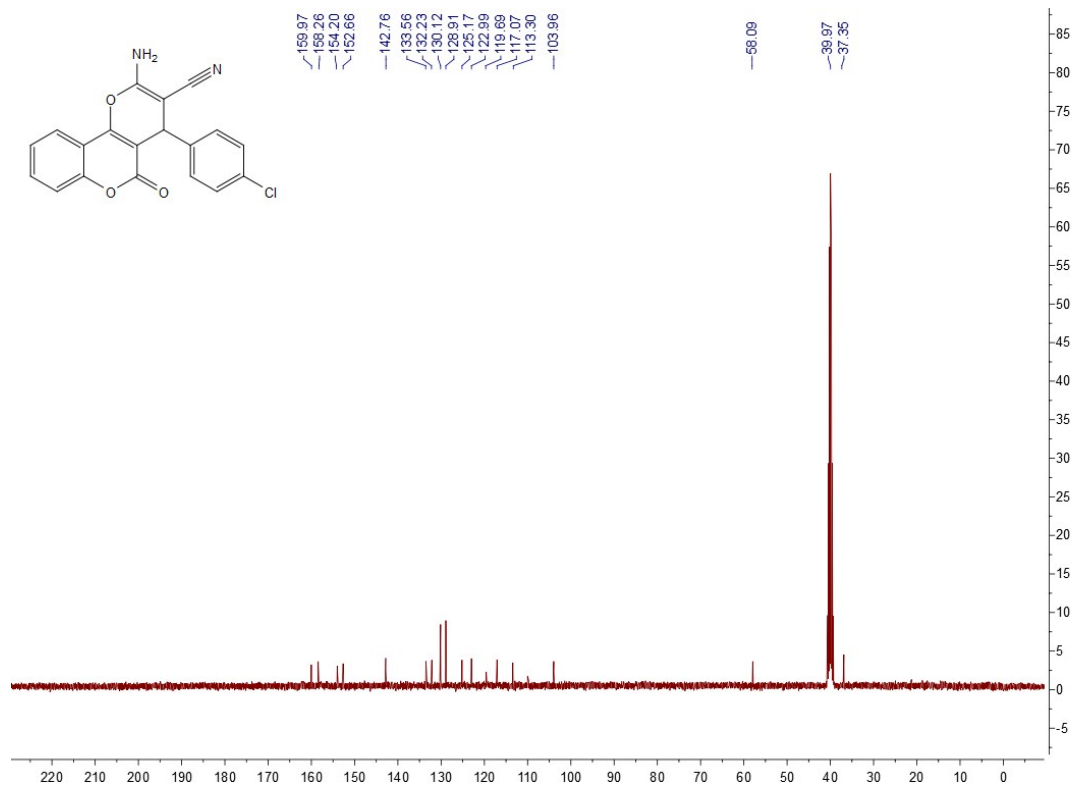

4k

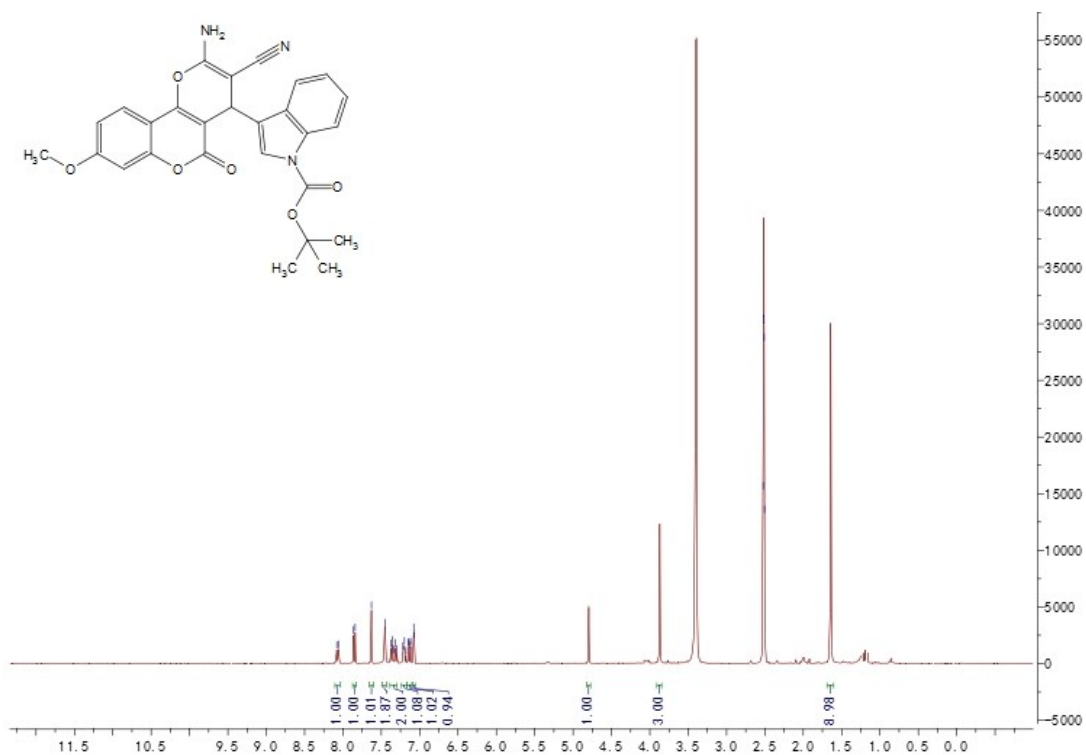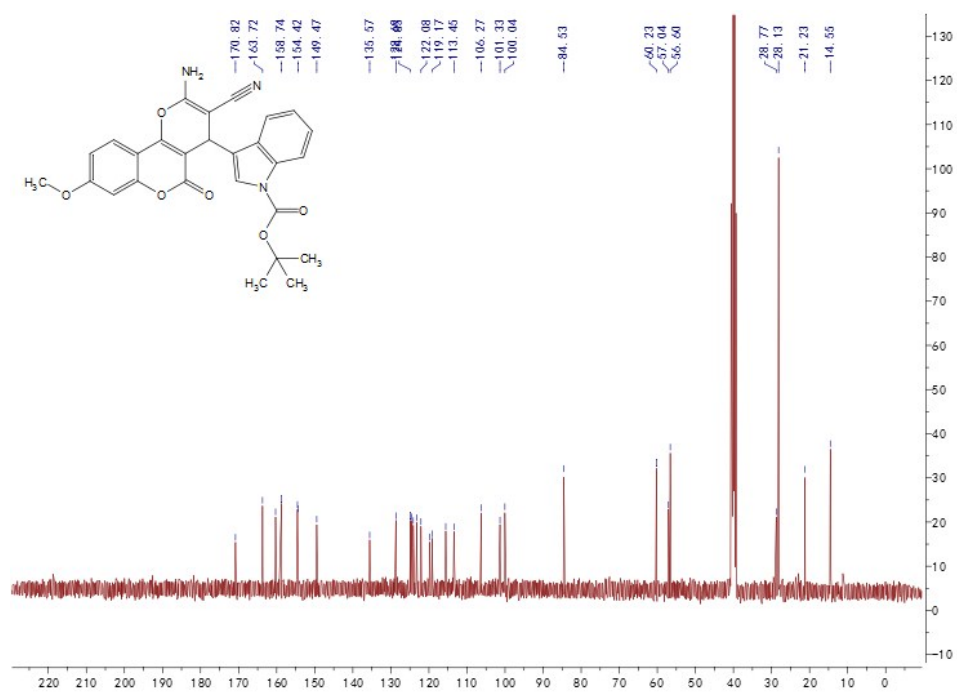

41

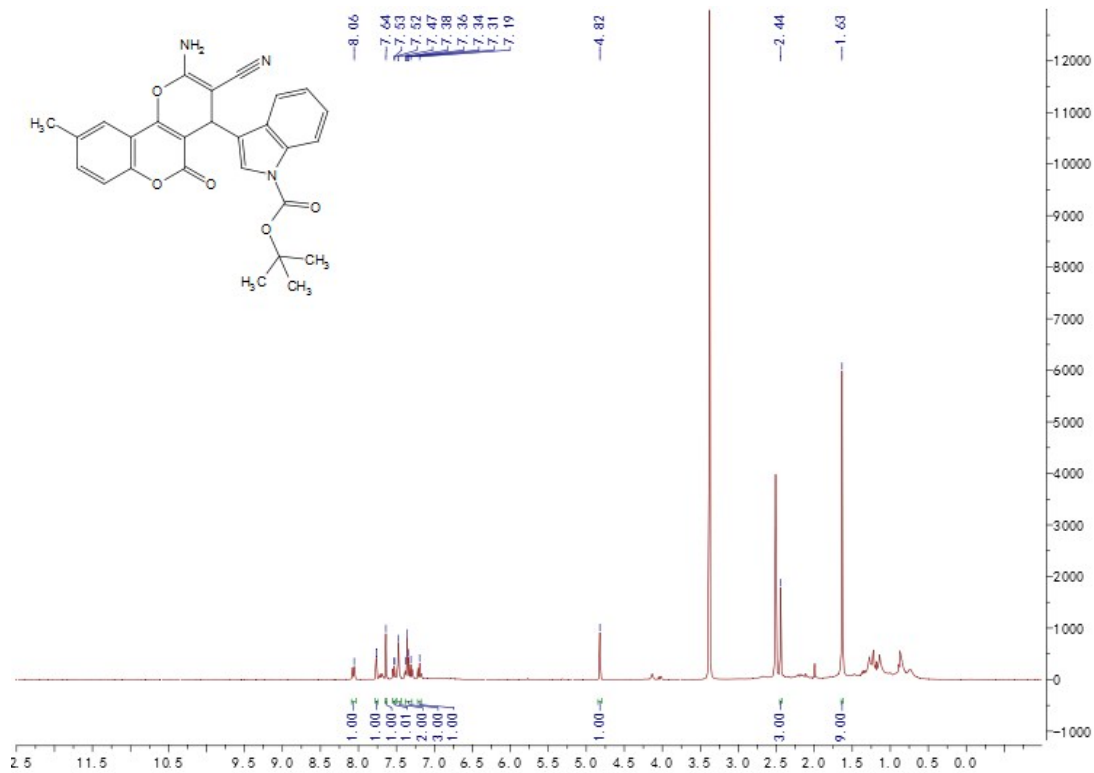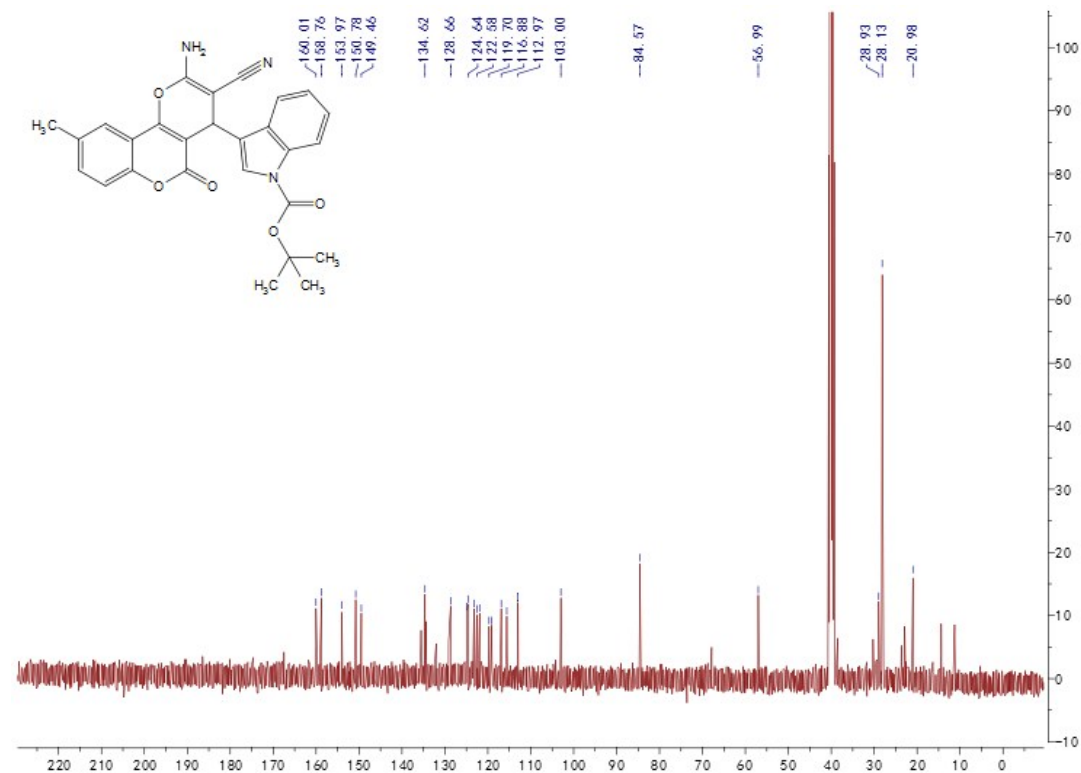

4m

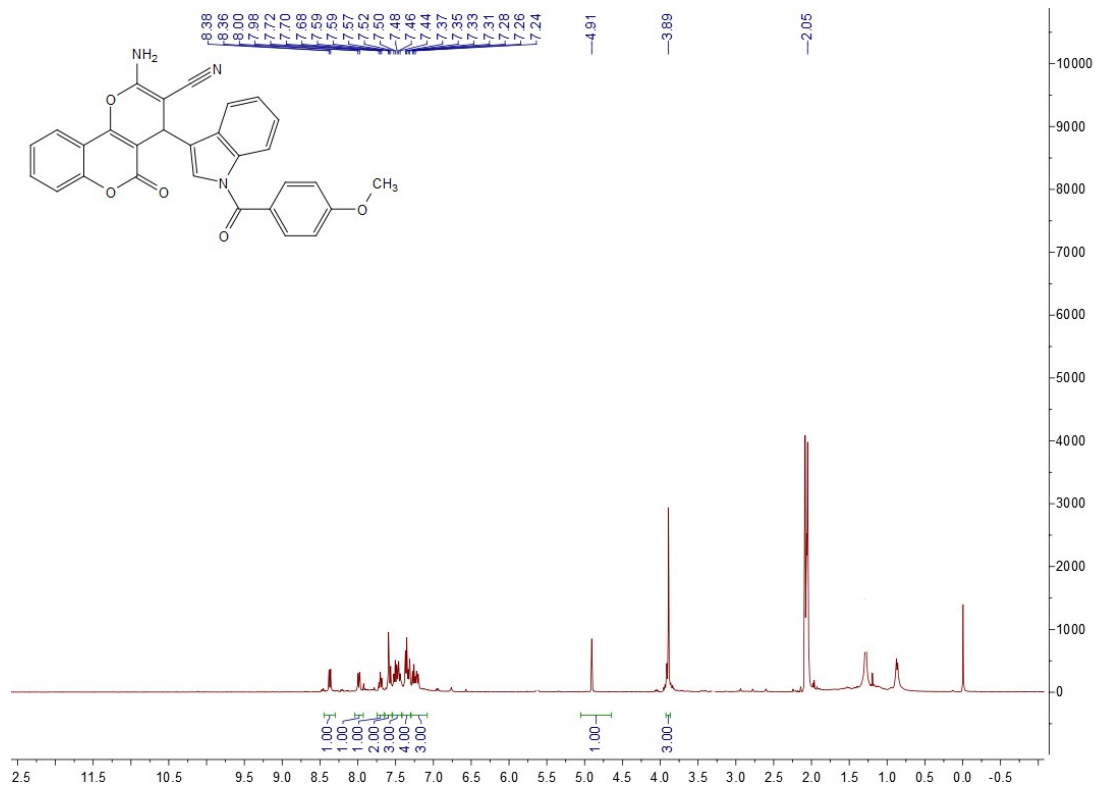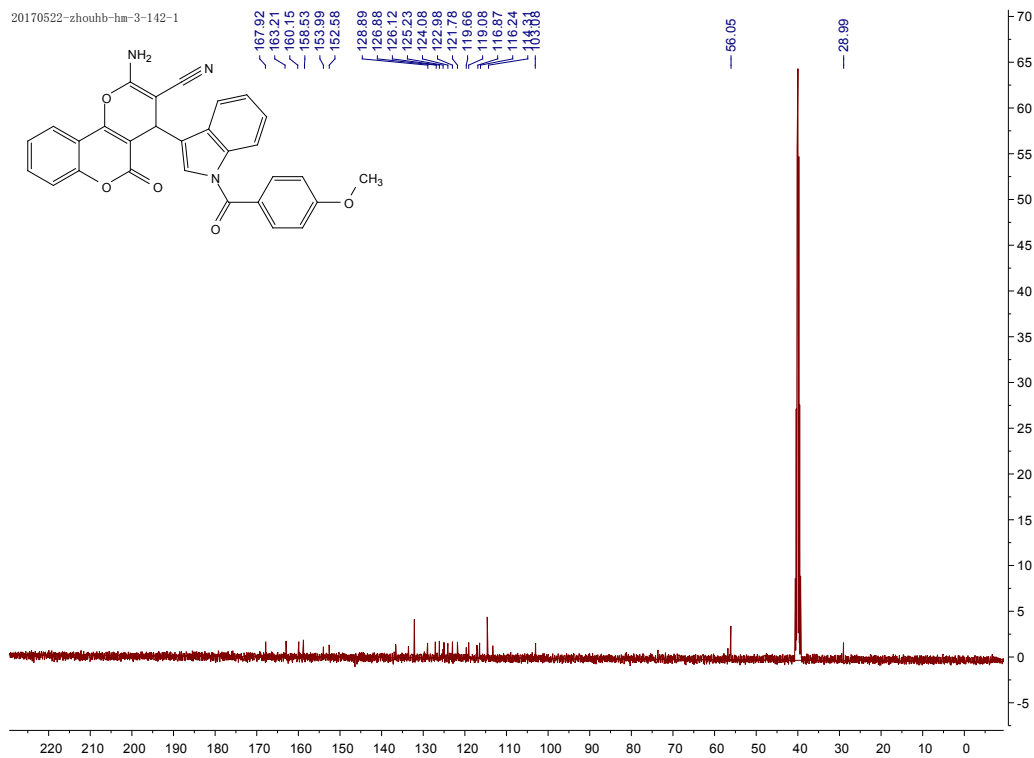

4n

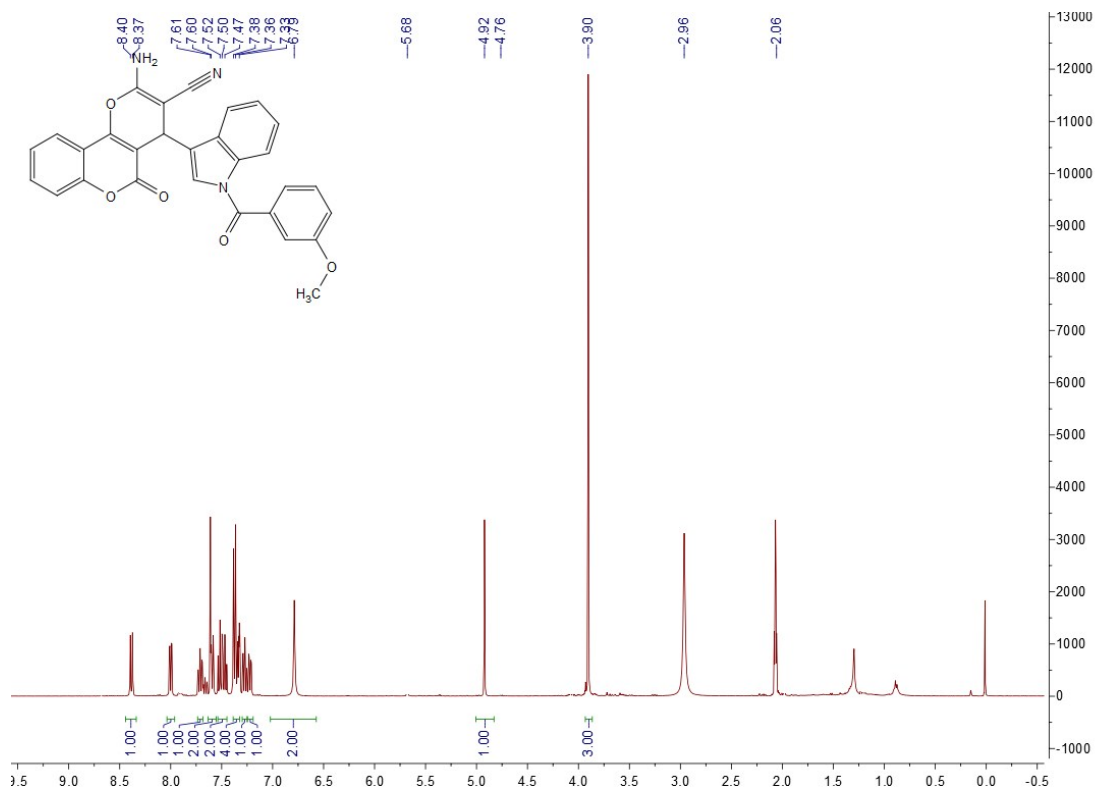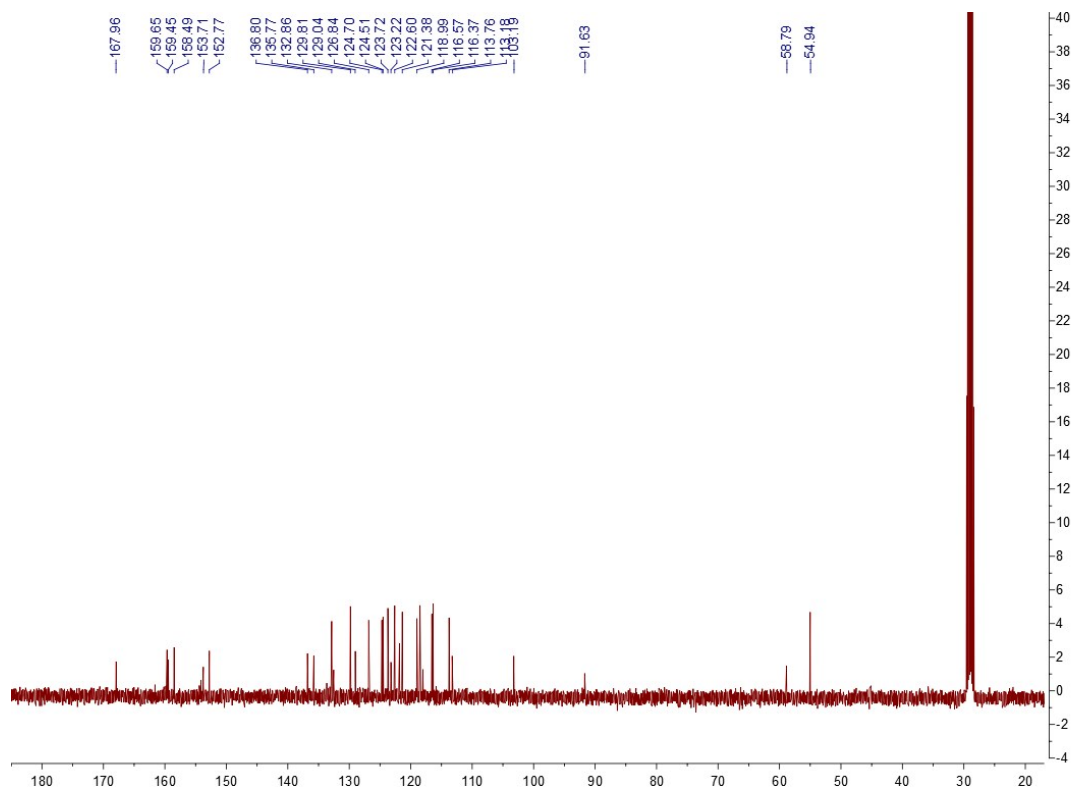

40

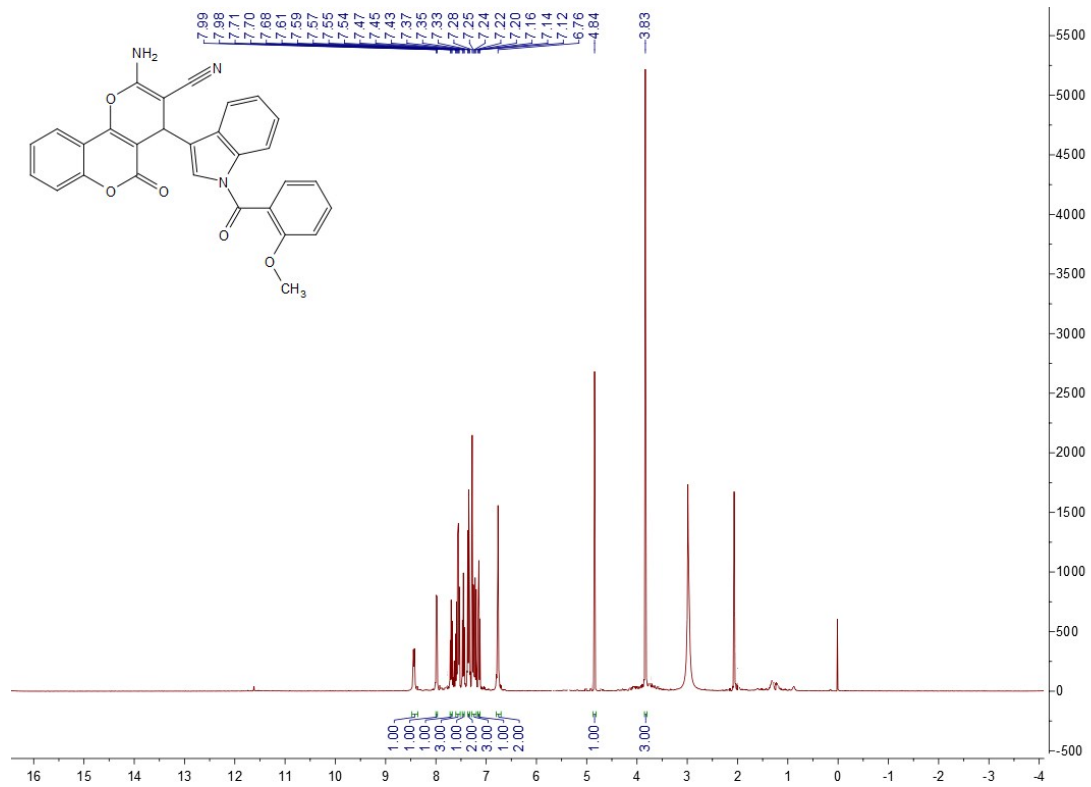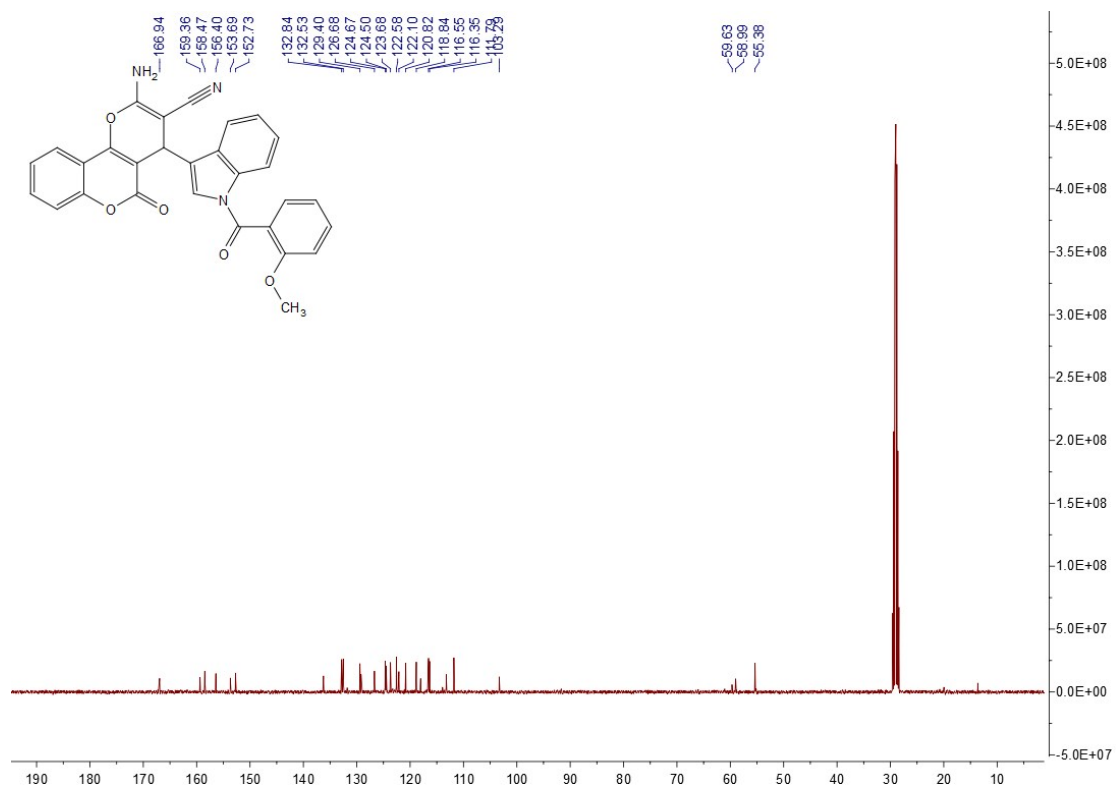



4p

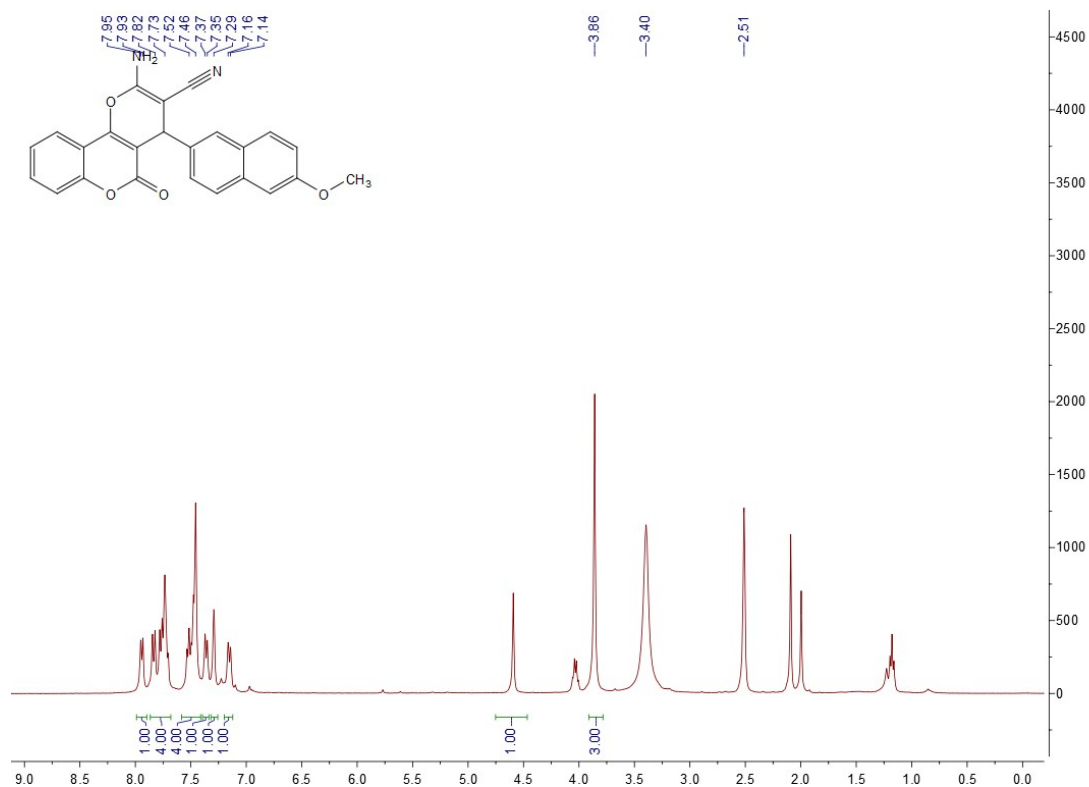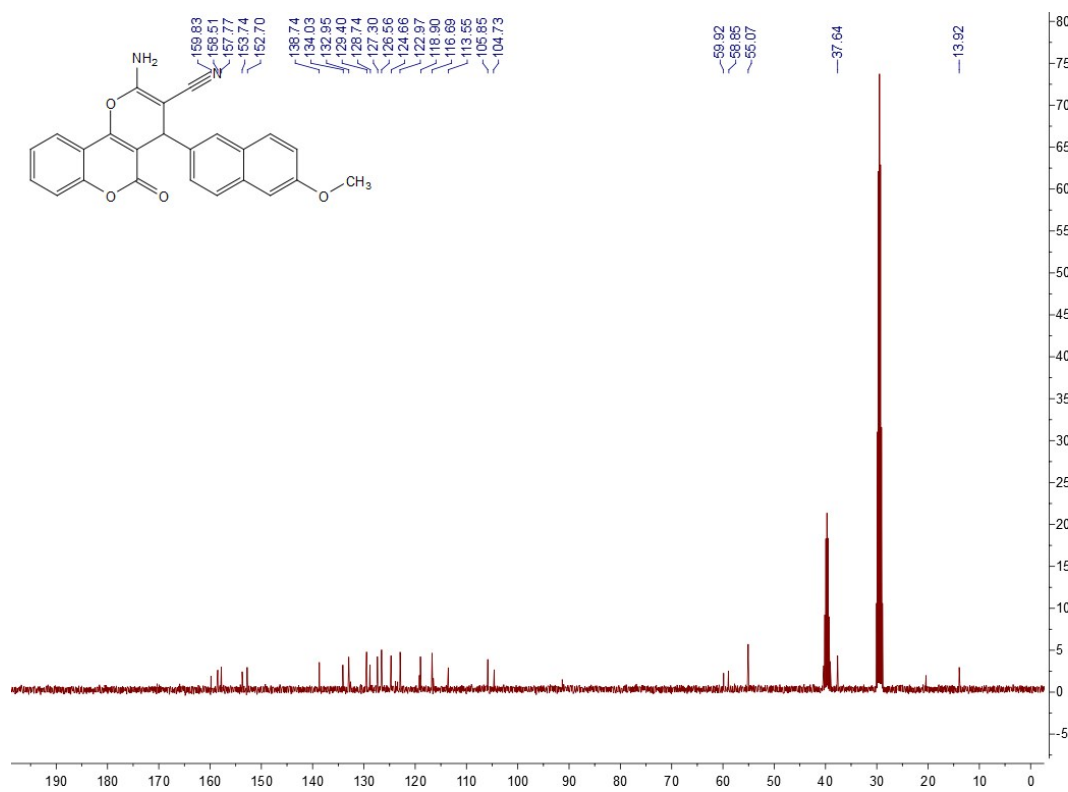

1a

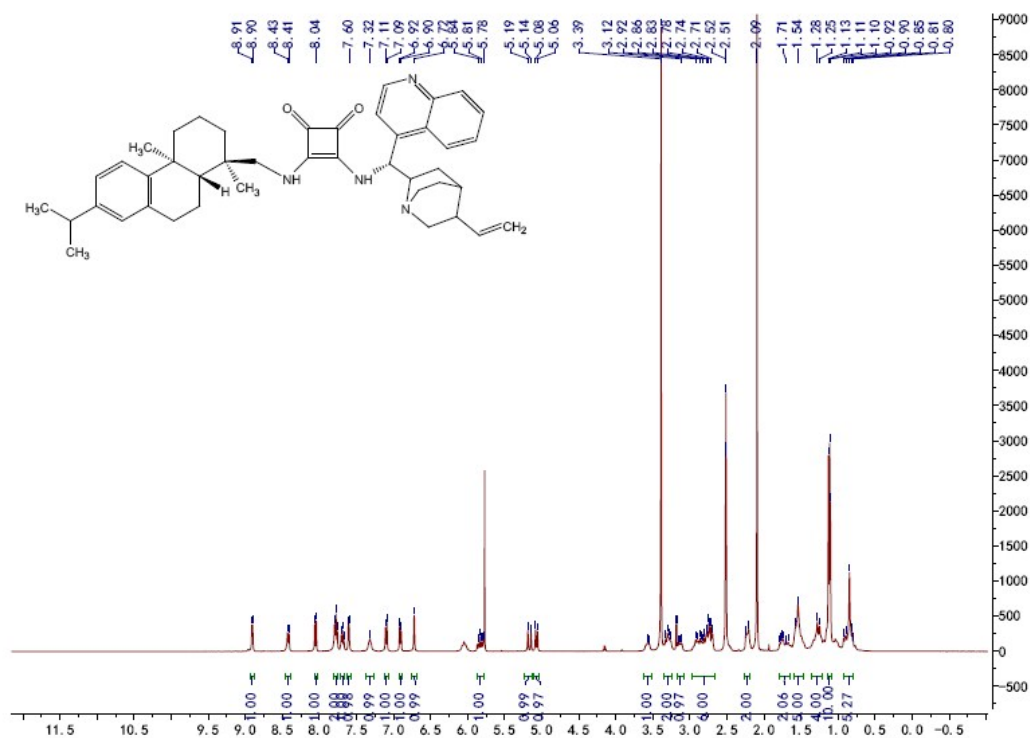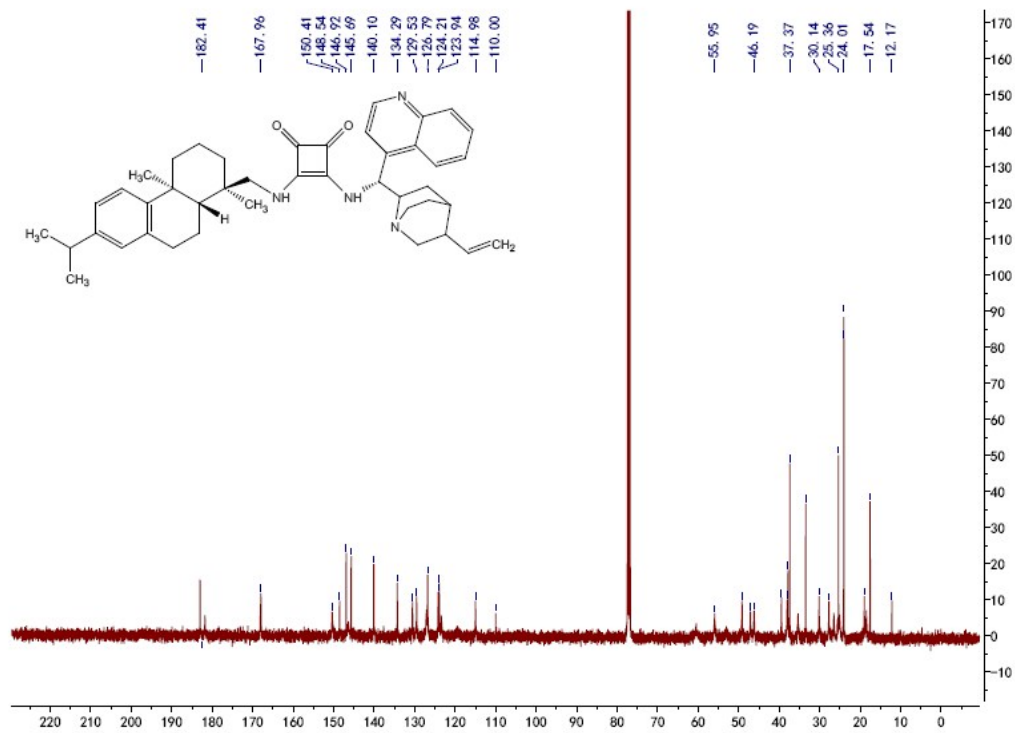

## II HPLC spectra of compound 4

4a

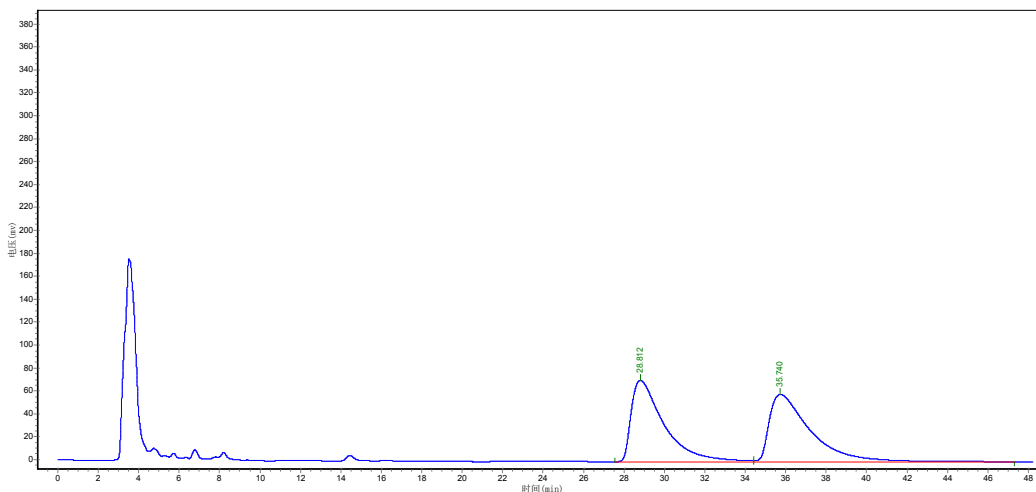

| Peak | Ret Time (min) | Height (mAU) | Area (Mau *s) | Area (%) |
|------|----------------|--------------|---------------|----------|
| 1    | 28.812         | 71039.188    | 7980246.500   | 48.9686  |
| 2    | 35.740         | 58684.453    | 8316418.500   | 51.0314  |

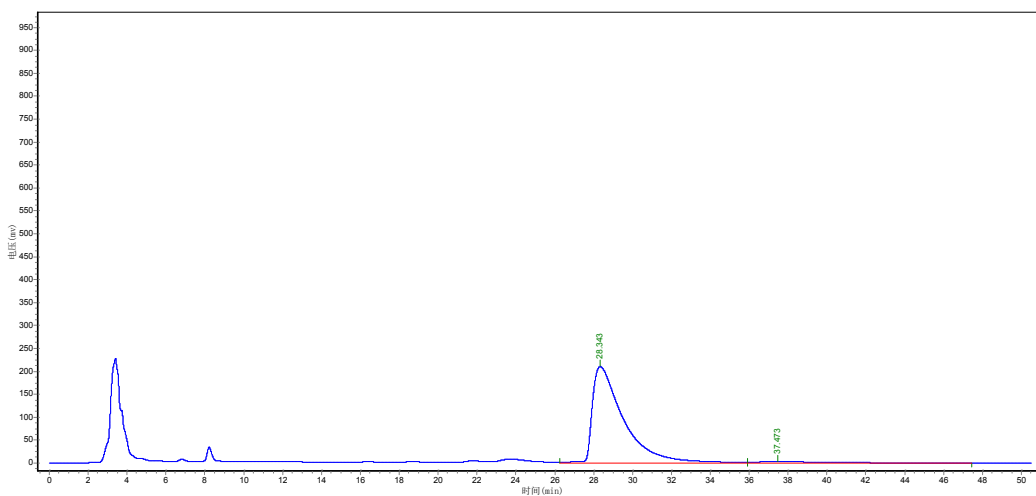

| Peak | Ret Time (min) | Height (mAU) | Area (Mau *s) | Area (%) |
|------|----------------|--------------|---------------|----------|
| 1    | 28.343         | 210171.875   | 23484714.000  | 96.5412  |
| 2    | 37.473         | 3963.806     | 841380.313    | 3.4588   |

4b

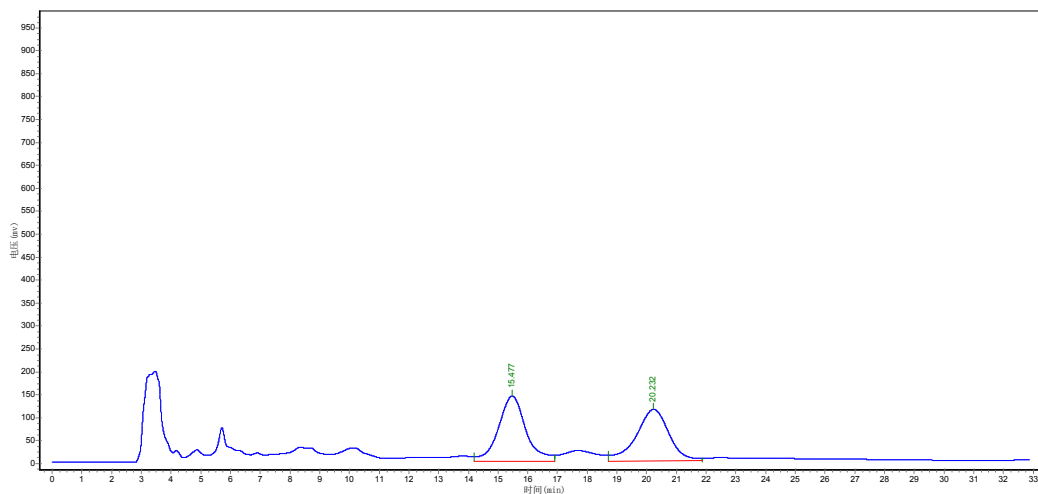

| Peak | Ret Time (min) | Height (mAU) | Area (Mau *s) | Area (%) |
|------|----------------|--------------|---------------|----------|
| 1    | 15.477         | 141912.031   | 9127446.000   | 51.3975  |
| 2    | 20.232         | 112483.563   | 8631091.000   | 48.6025  |

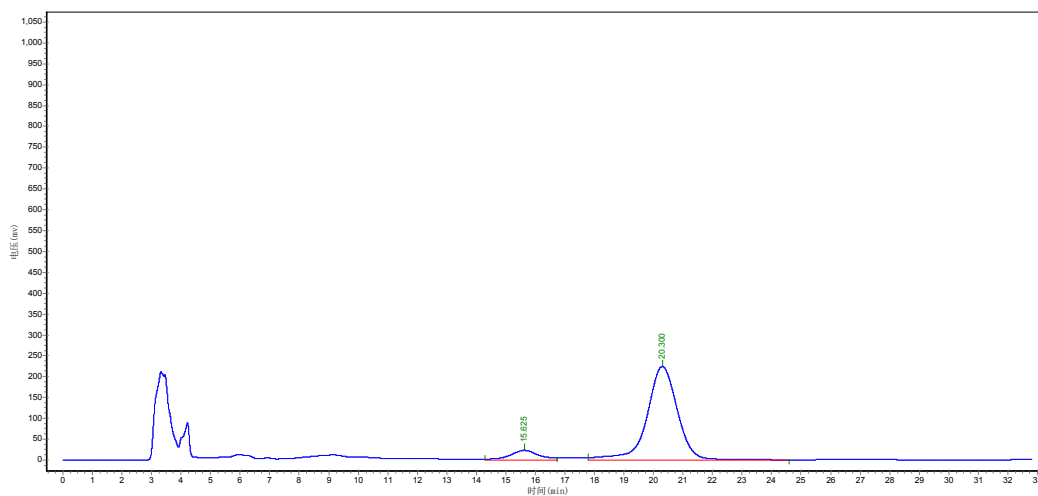

| Peak | Ret Time (min) | Height (mAU) | Area (Mau *s) | Area (%) |
|------|----------------|--------------|---------------|----------|
| 1    | 15.625         | 23654.666    | 1669433.500   | 9.2695   |
| 2    | 20.300         | 224616.406   | 16340494.000  | 90.7305  |

4c

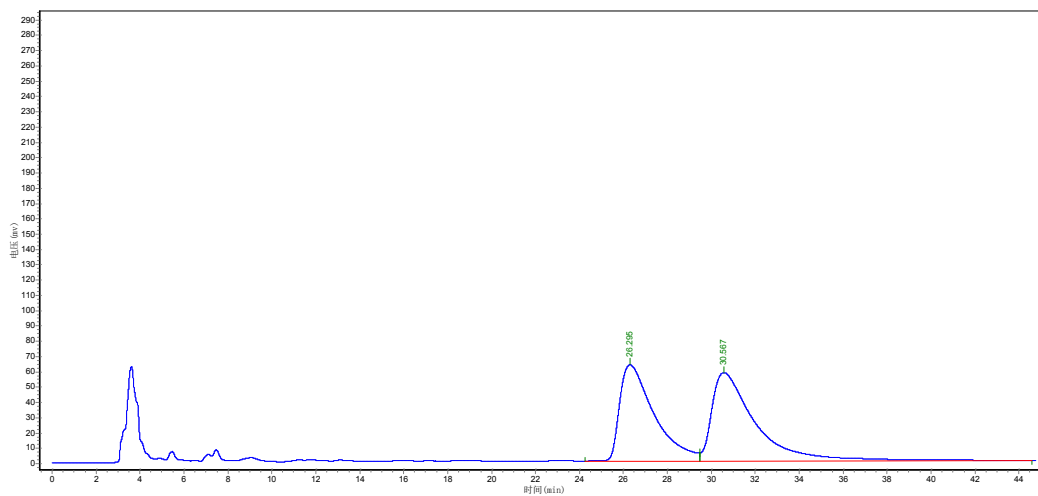

| Peak | Ret Time (min) | Height (mAU) | Area (Mau *s) | Area (%) |
|------|----------------|--------------|---------------|----------|
| 1    | 26.295         | 63106.055    | 6889177.500   | 46.3057  |
| 2    | 30.567         | 57792.109    | 7988438.000   | 53.6943  |

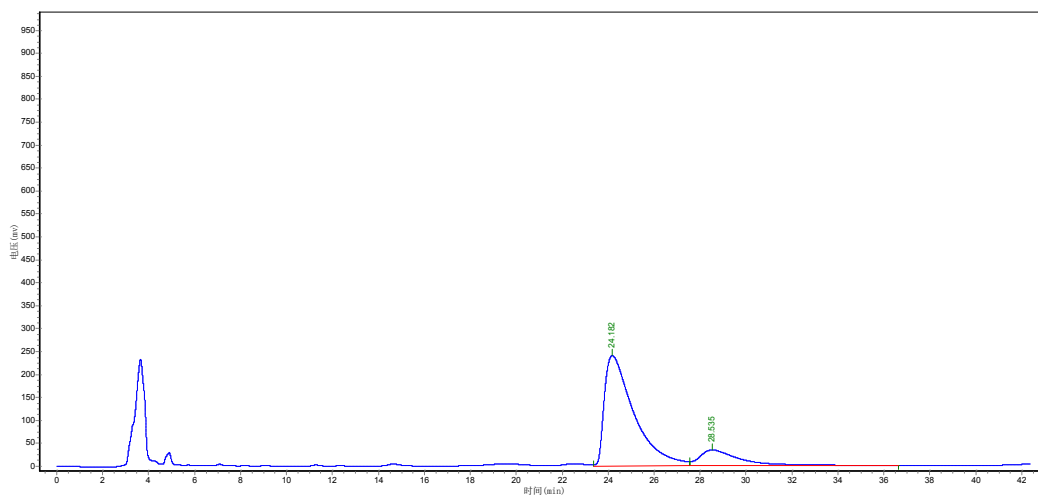

| Peak | Ret Time (min) | Height (mAU) | Area (Mau *s) | Area (%) |
|------|----------------|--------------|---------------|----------|
| 1    | 24.182         | 240483.547   | 21542524.000  | 83.5342  |
| 2    | 28.535         | 34416.328    | 4246342.500   | 16.4658  |

4d

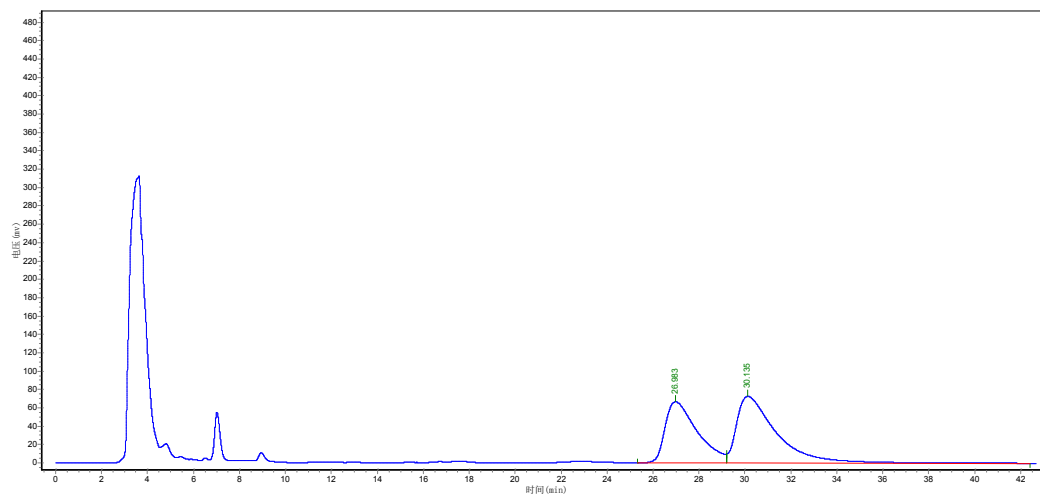

| Peak | Ret Time (min) | Height (mAU) | Area (Mau *s) | Area (%) |
|------|----------------|--------------|---------------|----------|
| 1    | 26.983         | 66652.930    | 7479100.000   | 47.4786  |
| 2    | 30.135         | 72554.813    | 8373524.000   | 52.5214  |

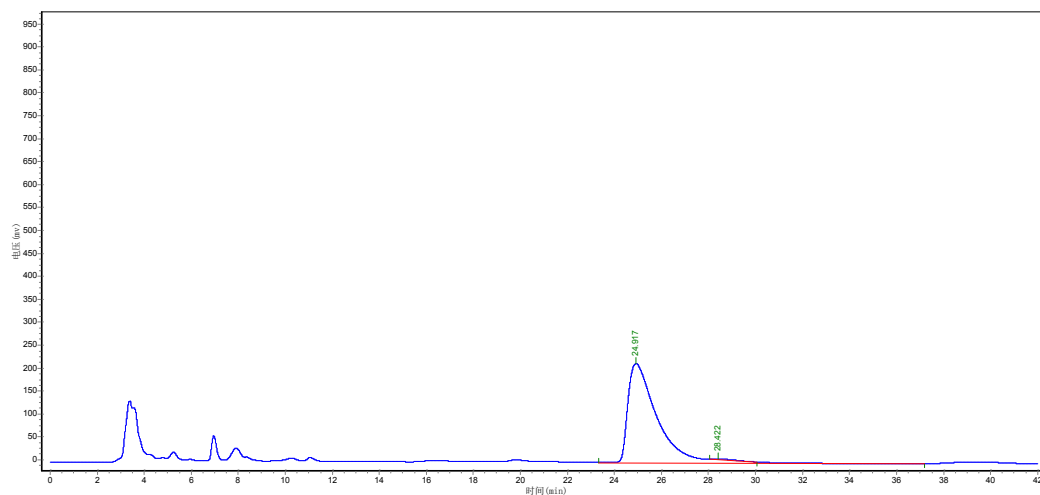

| Peak | Ret Time (min) | Height (mAU) | Area (Mau *s) | Area (%) |
|------|----------------|--------------|---------------|----------|
| 1    | 24.917         | 217011.078   | 19372962.000  | 99.4600  |
| 2    | 28.422         | 1419.900     | 105174.344    | 0.5400   |

4e

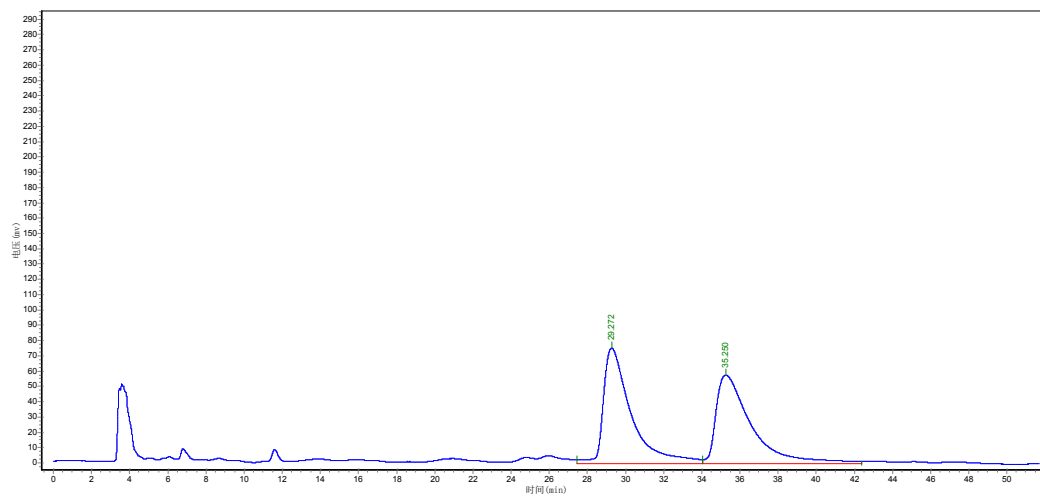

| Peak | Ret Time (min) | Height (mAU) | Area (Mau *s) | Area (%) |
|------|----------------|--------------|---------------|----------|
| 1    | 29.272         | 75297.383    | 7630465.000   | 50.6193  |
| 2    | 35.250         | 57836.449    | 7443767.000   | 49.3807  |

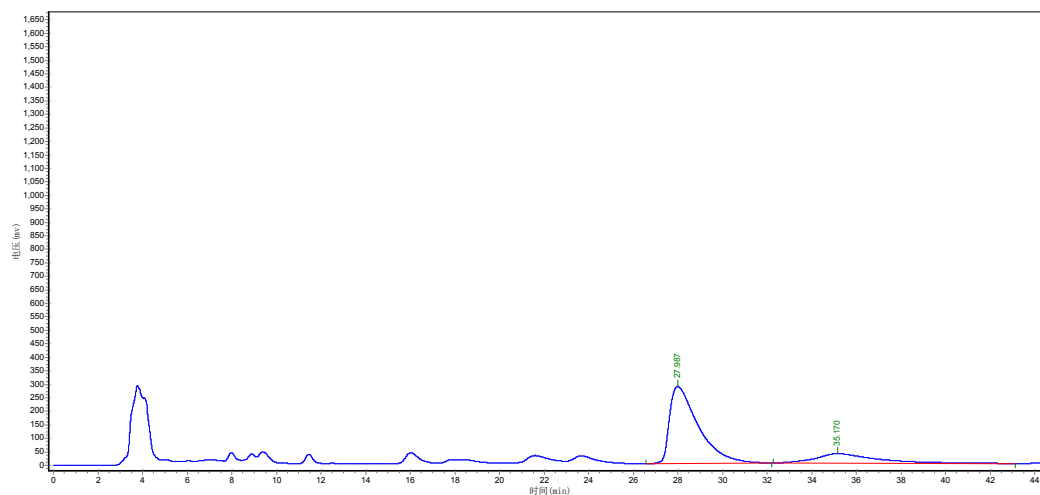

| Peak | Ret Time (min) | Height (mAU) | Area (Mau *s) | Area (%) |
|------|----------------|--------------|---------------|----------|
| 1    | 27.987         | 286119.906   | 25666466.000  | 79.4000  |
| 2    | 35.170         | 34988.988    | 6659070.000   | 20.6000  |

4f

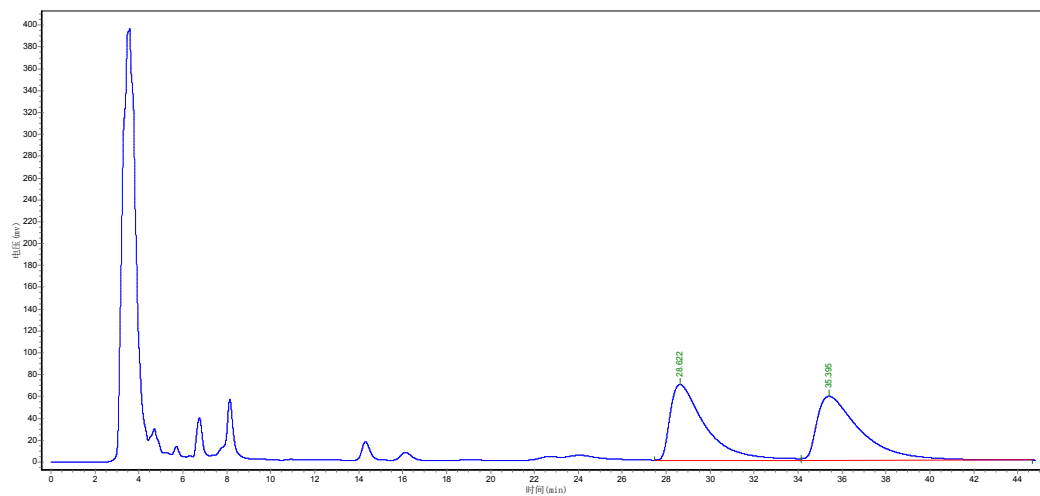

| Peak | Ret Time (min) | Height (mAU) | Area (Mau *s) | Area (%) |
|------|----------------|--------------|---------------|----------|
| 1    | 28.622         | 69826.406    | 7853365.000   | 49.1447  |
| 2    | 35.395         | 58796.098    | 8126707.500   | 50.8553  |

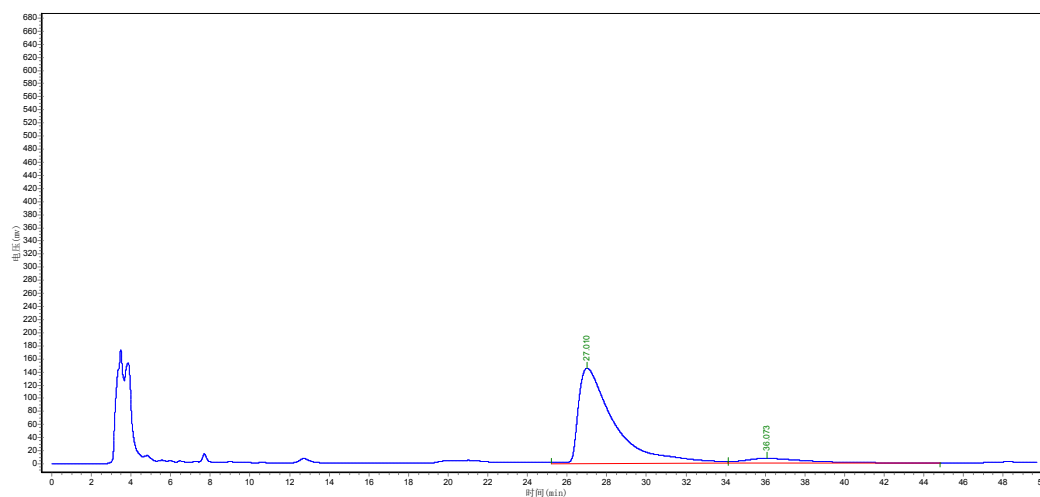

| Peak | Ret Time (min) | Height (mAU) | Area (Mau *s) | Area (%) |
|------|----------------|--------------|---------------|----------|
| 1    | 27.010         | 145306.922   | 18264700.000  | 91.2157  |
| 2    | 36.073         | 7464.083     | 1758932.875   | 8.7843   |



4g

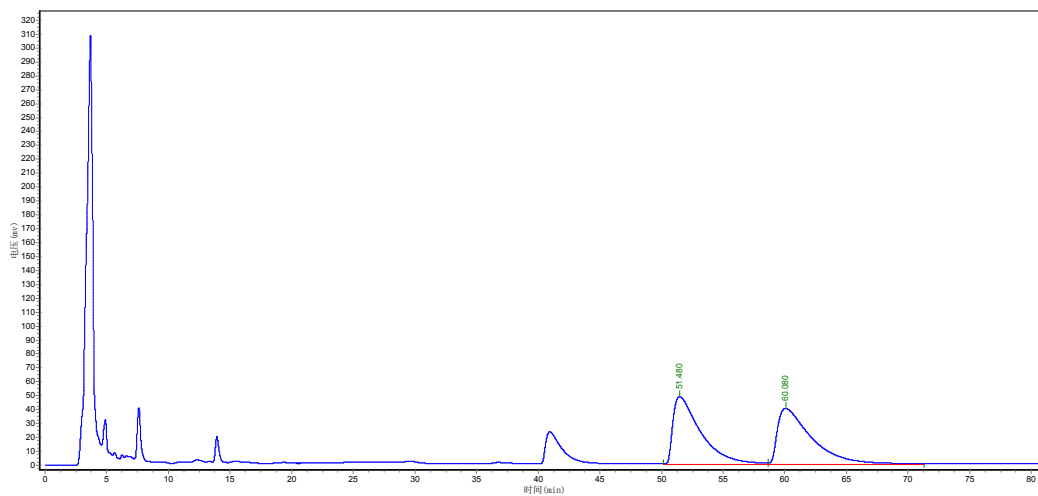

| Peak | Ret Time (min) | Height (mAU) | Area (Mau *s) | Area (%) |
|------|----------------|--------------|---------------|----------|
| 1    | 51.480         | 48674.234    | 7614213.000   | 49.6437  |
| 2    | 60.080         | 40171.672    | 7723521.000   | 50.3563  |

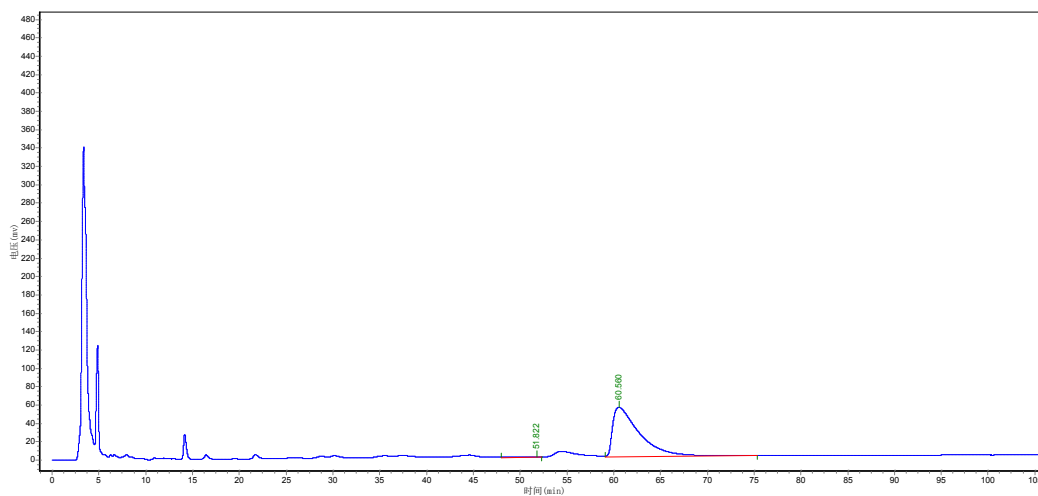

| Peak | Ret Time (min) | Height (mAU) | Area (Mau *s) | Area (%) |
|------|----------------|--------------|---------------|----------|
| 1    | 51.822         | 605.236      | 155649.344    | 1.4262   |
| 2    | 60.560         | 53854.043    | 10757606.000  | 98.5738  |

4h

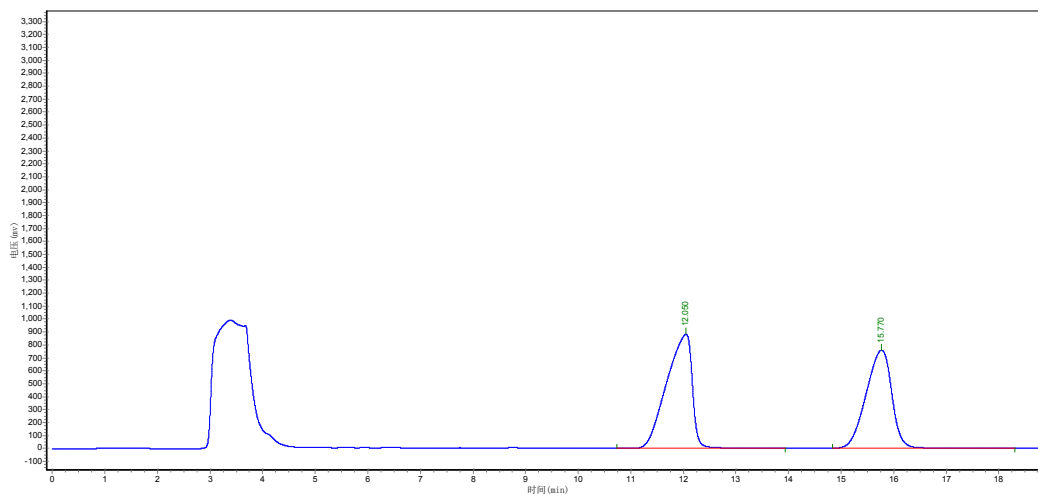

| Peak | Ret Time (min) | Height (mAU) | Area (Mau *s) | Area (%) |
|------|----------------|--------------|---------------|----------|
| 1    | 12.050         | 882884.813   | 29950312.000  | 53.5685  |
| 2    | 15.770         | 760365.688   | 25959944.000  | 46.4315  |

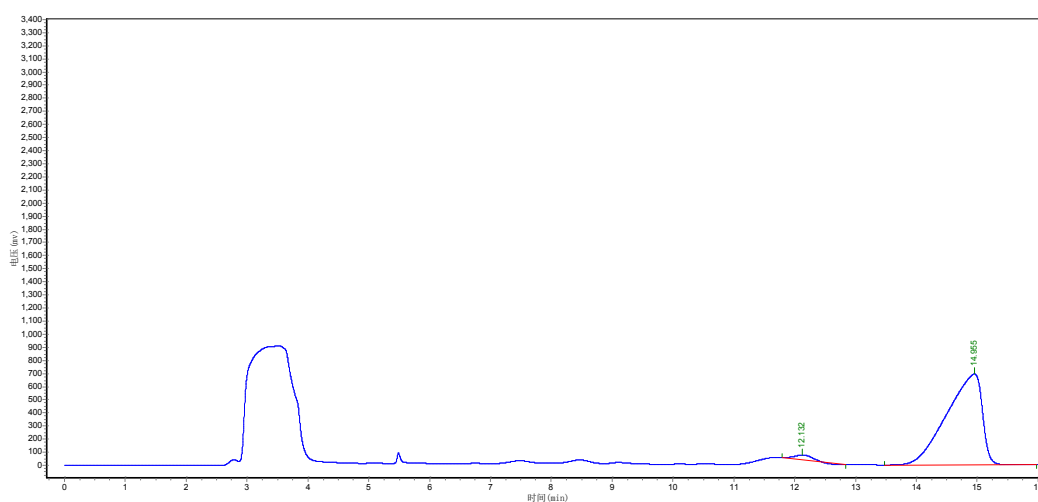

| Peak | Ret Time (min) | Height (mAU) | Area (Mau *s) | Area (%) |
|------|----------------|--------------|---------------|----------|
| 1    | 12.132         | 38020.813    | 689574.000    | 2.4006   |
| 2    | 14.955         | 693413.250   | 28035680.000  | 97.5994  |

4i

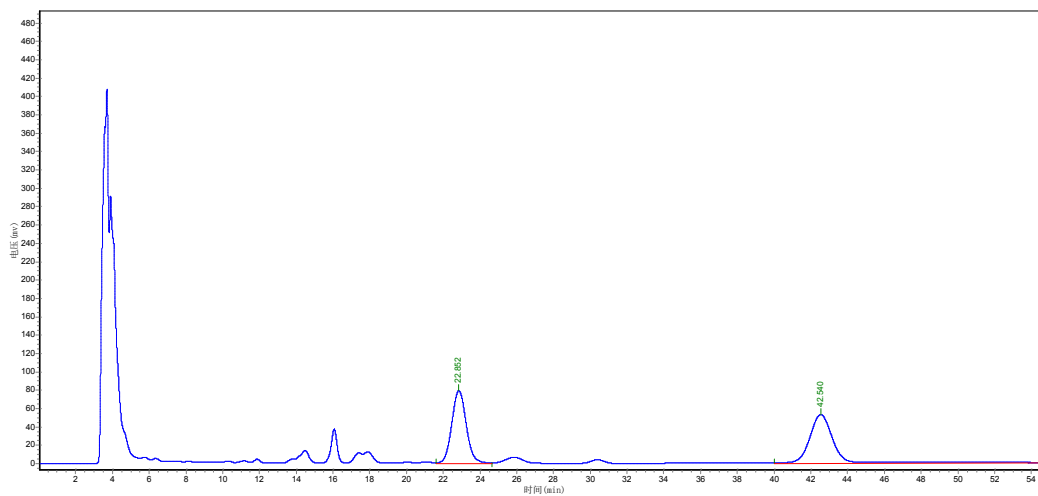

| Peak | Ret Time (min) | Height (mAU) | Area (Mau *s) | Area (%) |
|------|----------------|--------------|---------------|----------|
| 1    | 22.852         | 79522.016    | 4368077.000   | 44.7510  |
| 2    | 42.540         | 53134.879    | 5392761.500   | 55.2490  |

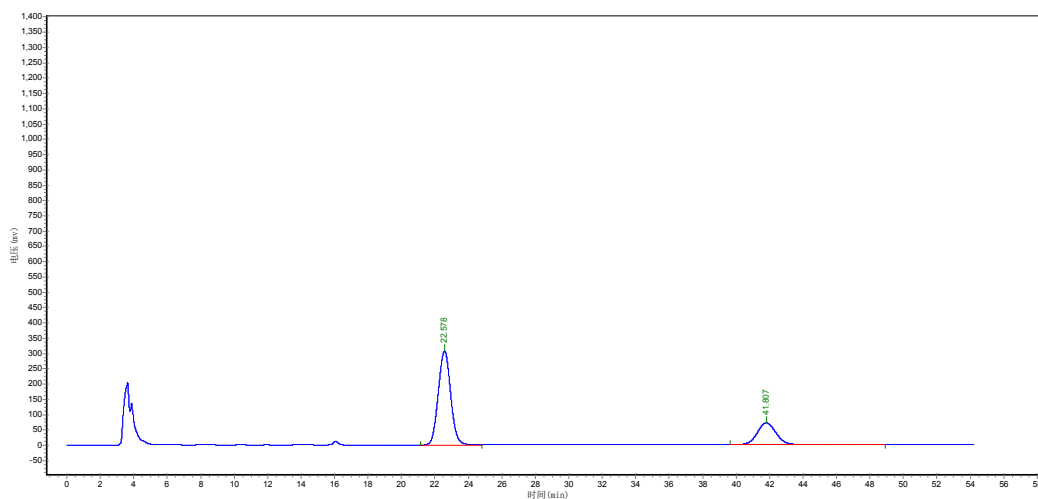

| Peak | Ret Time (min) | Height (mAU) | Area (Mau *s) | Area (%) |
|------|----------------|--------------|---------------|----------|
| 1    | 22.578         | 307270.719   | 15851232.000  | 73.9101  |
| 2    | 41.807         | 71141.859    | 5595420.500   | 26.0899  |

4j

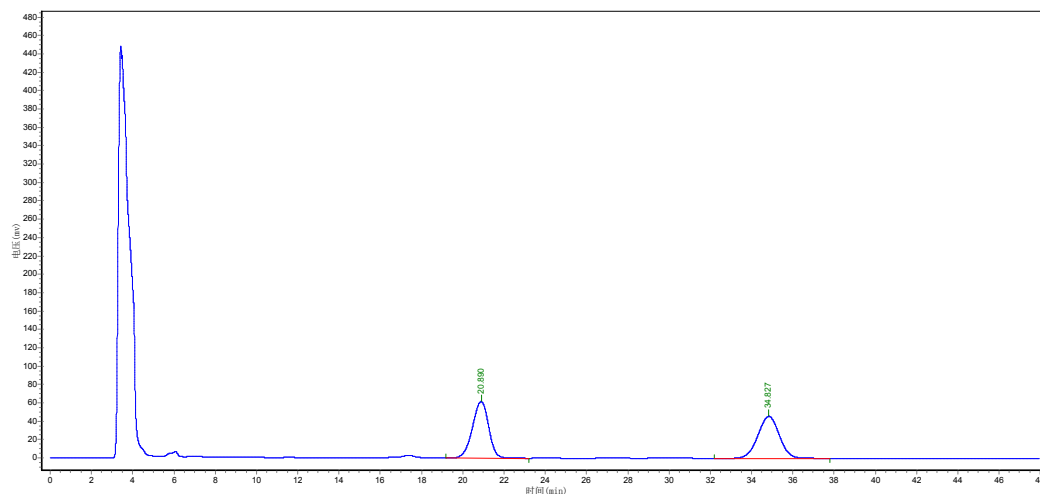

| Peak | Ret Time (min) | Height (mAU) | Area (Mau *s) | Area (%) |
|------|----------------|--------------|---------------|----------|
| 1    | 20.890         | 61871.836    | 3392466.750   | 50.7355  |
| 2    | 34.827         | 45762.941    | 3294107.500   | 49.2645  |

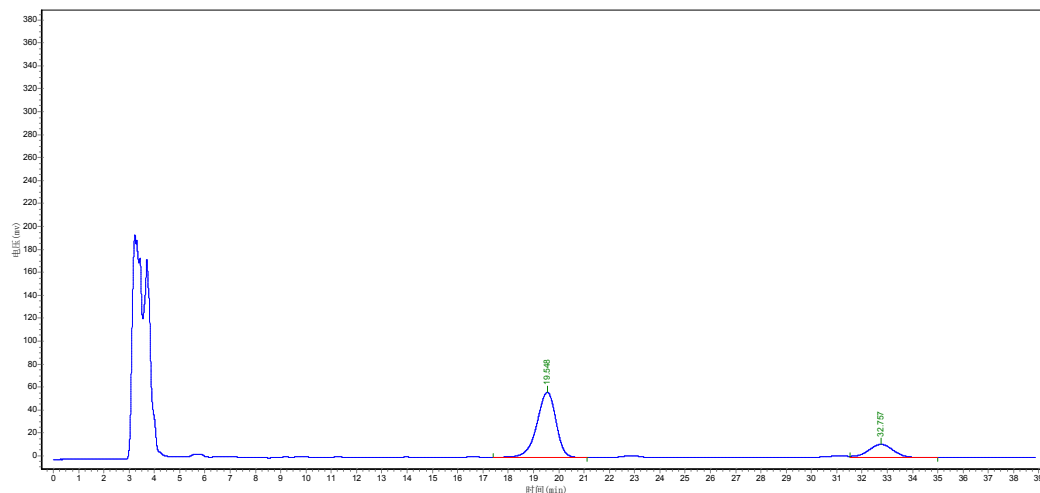

| Peak | Ret Time (min) | Height (mAU) | Area (Mau *s) | Area (%) |
|------|----------------|--------------|---------------|----------|
| 1    | 19.548         | 56674.211    | 2962628.250   | 81.5396  |
| 2    | 32.757         | 10660.020    | 670731.188    | 18.4604  |

4k

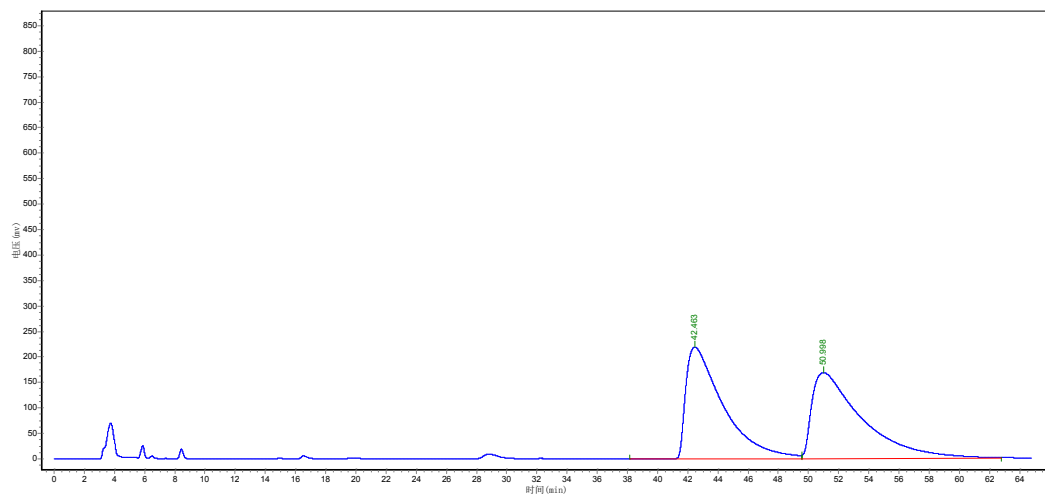

| Peak | Ret Time (min) | Height (mAU) | Area (Mau *s) | Area (%) |
|------|----------------|--------------|---------------|----------|
| 1    | 42.463         | 219074.344   | 37800836.000  | 49.2964  |
| 2    | 50.998         | 168771.781   | 38879836.000  | 50.7036  |

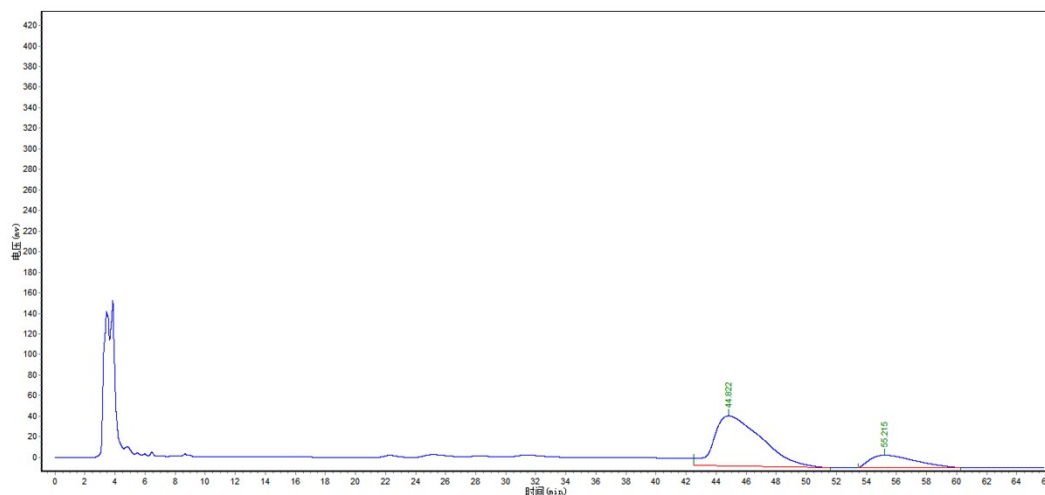

| Peak | Ret Time (min) | Height (mAU) | Area (Mau *s) | Area (%) |
|------|----------------|--------------|---------------|----------|
| 1    | 44.822         | 48549.945    | 10658692.000  | 81.0854  |
| 2    | 55.215         | 12051.740    | 2486324.750   | 18.9146  |

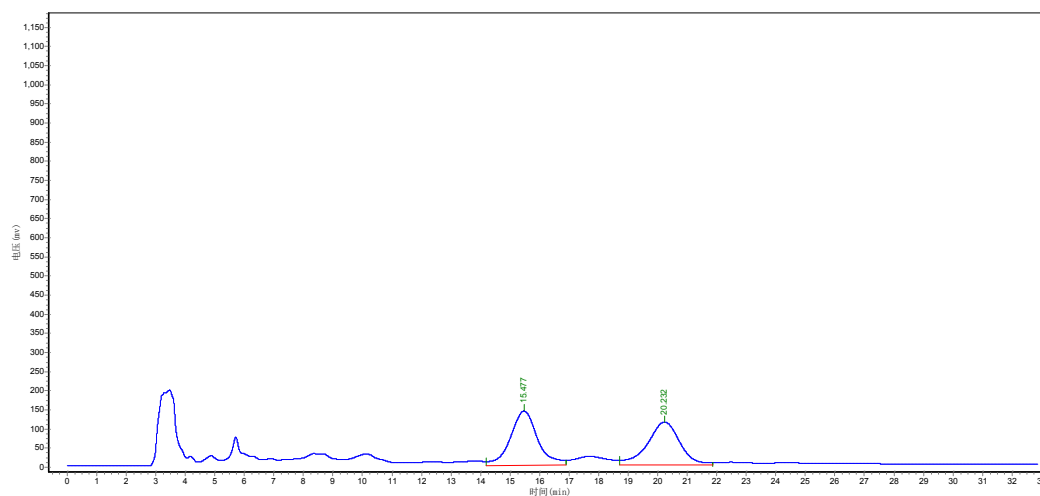

| Peak | Ret Time (min) | Height (mAU) | Area (Mau *s) | Area (%) |
|------|----------------|--------------|---------------|----------|
| 1    | 15.477         | 141912.031   | 9127446.000   | 51.3975  |
| 2    | 20.232         | 112483.563   | 8631091.000   | 48.6025  |

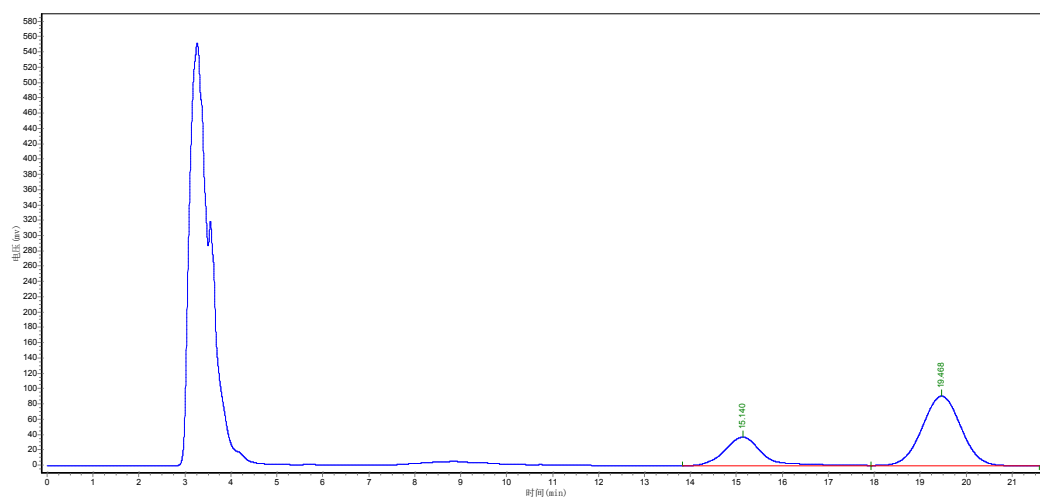

| Peak | Ret Time (min) | Height (mAU) | Area (Mau *s) | Area (%) |
|------|----------------|--------------|---------------|----------|
| 1    | 15.140         | 37607.488    | 2207534.000   | 29.0857  |
| 2    | 19.468         | 91352.102    | 5382235.000   | 70.9143  |

# 4m

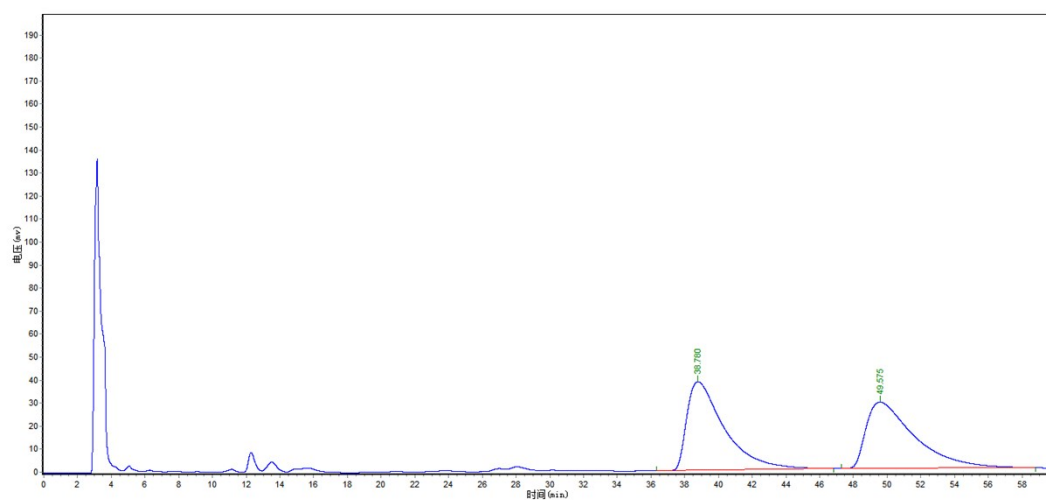

| 峰号 | 峰名     | 保留时间      | 峰高          | 峰面积     | 含量 |
|----|--------|-----------|-------------|---------|----|
| 1  | 38.780 | 38547.676 | 5943547.500 | 50.8863 |    |
| 2  | 49.575 | 28758.545 | 5736512.000 | 49.1137 |    |

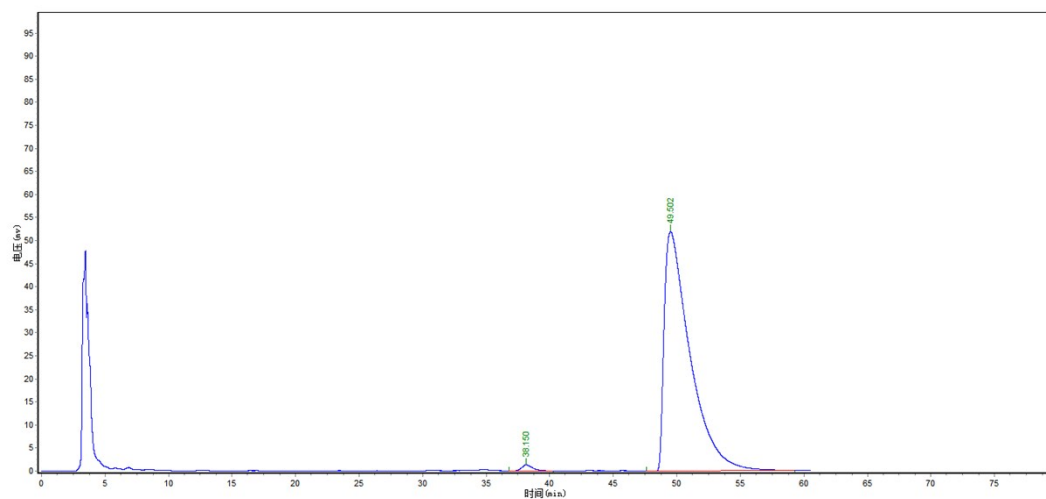

| 峰号 | 峰名     | 保留时间      | 峰高          | 峰面积     | 含量             |
|----|--------|-----------|-------------|---------|----------------|
| 1  | 38.150 | 1278.287  | 73092.352   | 0.9929  |                |
| 2  | 49.502 | 51921.703 | 7288504.500 | 99.0071 | HM-3-142-2 98% |

4n

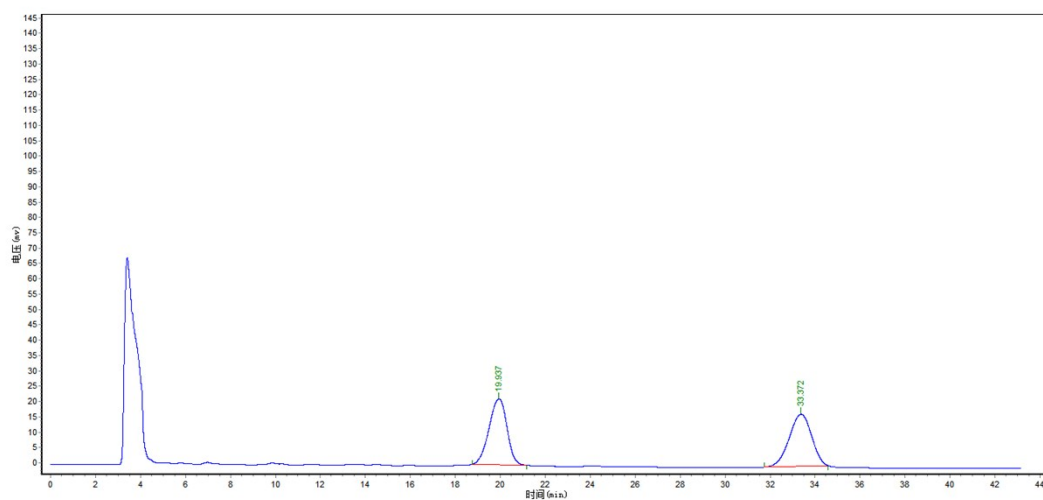

| 峰号 | 峰名     | 保留时间      | 峰高          | 峰面积     | 含量 |
|----|--------|-----------|-------------|---------|----|
| 1  | 19.937 | 21540.975 | 1190426.500 | 50.3381 |    |
| 2  | 33.372 | 16985.869 | 1174435.875 | 49.6619 |    |

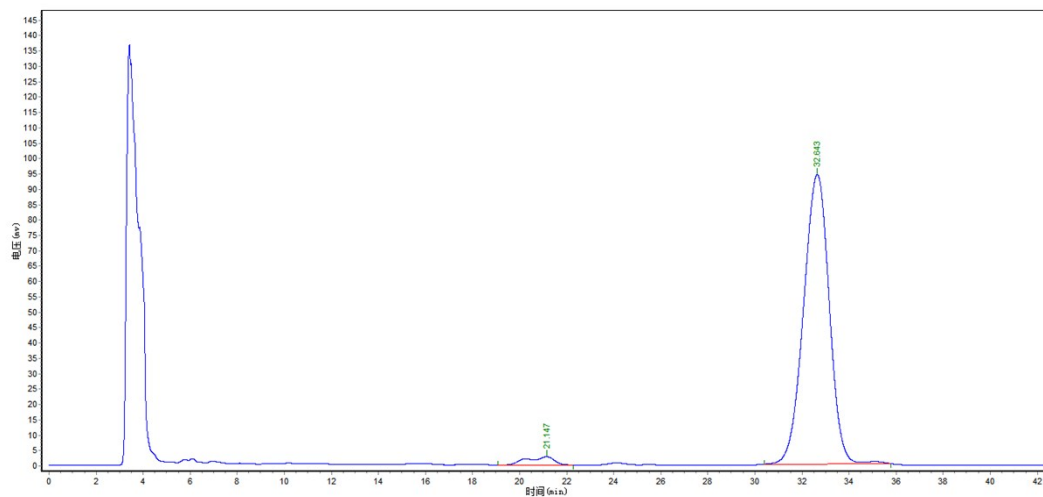

| 峰号 | 峰名     | 保留时间      | 峰高          | 峰面积     | 含量 |
|----|--------|-----------|-------------|---------|----|
| 1  | 21.147 | 2710.160  | 218931.000  | 2.9754  |    |
| 2  | 32.643 | 94169.586 | 7138996.000 | 97.0246 |    |



# 40

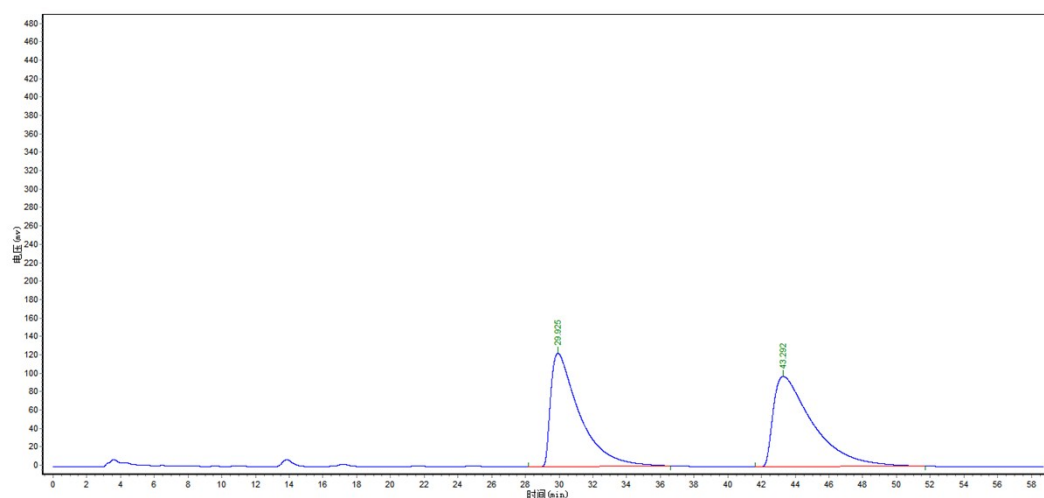

| 峰号 | 峰名     | 保留时间       | 峰高           | 峰面积     | 含量 |
|----|--------|------------|--------------|---------|----|
| 1  | 29.925 | 123226.719 | 14560932.000 | 47.7959 |    |
| 2  | 43.292 | 97991.828  | 15903866.000 | 52.2041 |    |

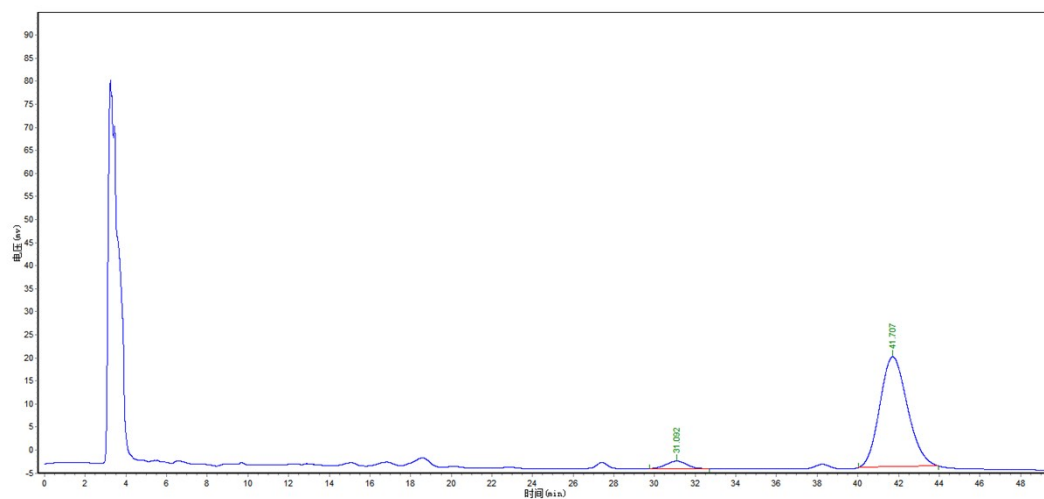

| 峰号 | 峰名     | 保留时间      | 峰高          | 峰面积     | 含量 |
|----|--------|-----------|-------------|---------|----|
| 1  | 31.092 | 1611.734  | 110761.609  | 4.6939  |    |
| 2  | 41.707 | 23854.264 | 2248931.750 | 95.3061 |    |

4p

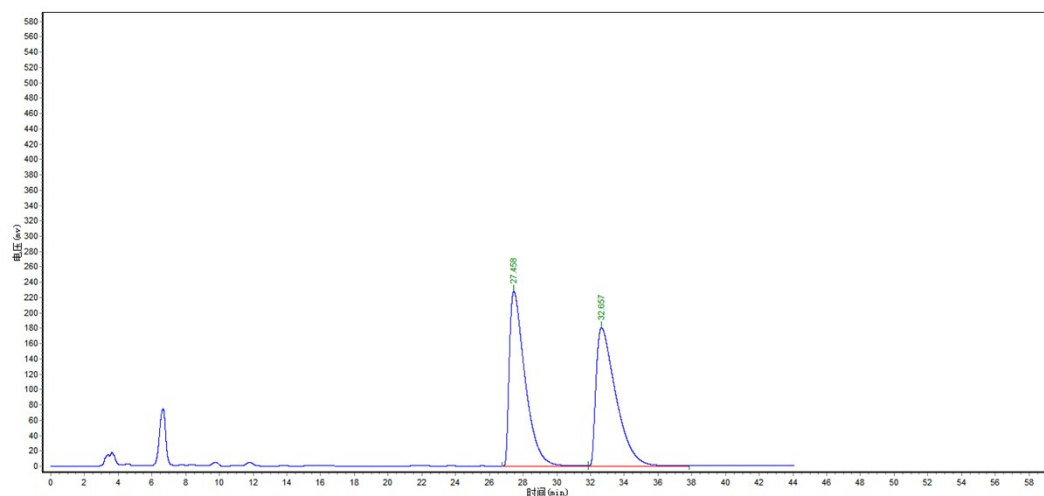

| 峰号 | 峰名     | 保留时间       | 峰高           | 峰面积     | 含量 |
|----|--------|------------|--------------|---------|----|
| 1  | 27.458 | 227601.266 | 14699840.000 | 49.9897 |    |
| 2  | 32.657 | 180455.266 | 14705889.000 | 50.0103 |    |

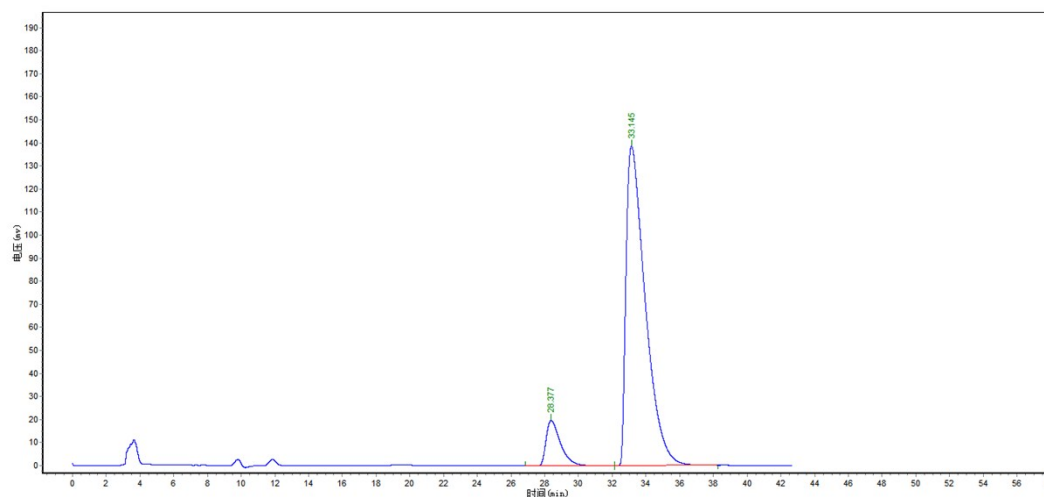

| 峰号 | 峰名     | 保留时间       | 峰高           | 峰面积     | 含量 |
|----|--------|------------|--------------|---------|----|
| 1  | 28.377 | 19714.949  | 1170667.875  | 9.6604  |    |
| 2  | 33.145 | 138696.375 | 10947515.000 | 90.3396 |    |

### III Computer modeling of the complex structures of AChE protein with (*S*)-**4p** and (*R*)-**4p**

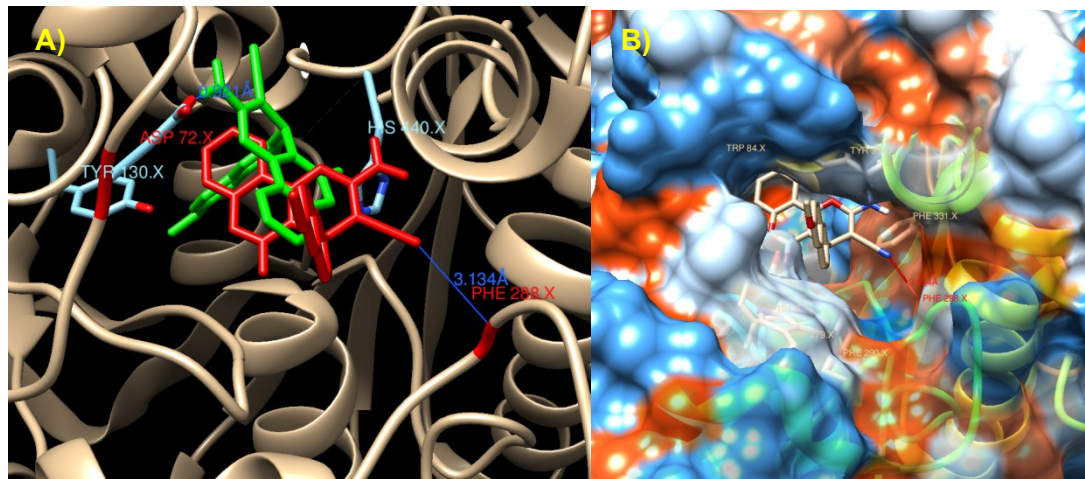

**Fig. S1.** (A) Computer modeling of the complex structures of AChE protein with (*S*)-**4p** (green) and (*R*)-**4p** (red). (B) The surface type between (*S*)-**4a** with AchE protein.

For compound **4p**, both enantiomers showed the similar  $IC_{50}$  values for AChE. In the proposed structures of **4p**-protein (**Fig. S1**), (*R*)- and (*S*)-conformers fitted well in the pocket, and can form hydrogen bonds with the protein (pdb: 2w6c). For (*S*)-**4p**, the amino group forms hydrogen bond with ASP 72 and the length is 0.921 Å; for (*R*)-**4p**, the cyano group forms hydrogen bond with PHE 288 and the length is 3.134 Å. In addition, the naphthalenyl moiety, the chiral determinant of the compounds was docked outside, at least to some extent, partially buried in the hydrophobic pocket. As such, both (*R*)- and (*S*)-**4p** had a very similar activity range. But for (*S*)-conformer, the hydrogen bonds are significantly stronger than the (*R*)-one, so a slightly lower  $IC_{50}$  value for (*S*)-**4p** was observed than that of (*R*)-**4p**.
